1 **Transcriptional and immunological analysis of the putative outer membrane protein and**  
2 **vaccine candidate TprL of *Treponema pallidum***

3

4 Austin M. Haynes<sup>1</sup>, Mark Fernandez<sup>2</sup>, Emily Romeis<sup>1</sup>, Oriol Mitjà<sup>3,4</sup>, Kelika A. Konda<sup>5,6</sup>, Silver  
5 K. Vargas<sup>5,7</sup>, Maria Eguiluz<sup>5</sup>, Carlos F. Caceres<sup>5</sup>, Jeffrey D. Klausner<sup>6</sup>, and Lorenzo Giacani<sup>1,2\*</sup>

6

7 <sup>1</sup>Department of Medicine, Division of Allergy and Infectious Diseases, University of  
8 Washington, Seattle, WA, USA

9 <sup>2</sup>Department of Global Health, University of Washington, Seattle, WA, USA

10 <sup>3</sup>Fight Aids and Infectious Diseases Foundation, Hospital Germans Trias I Pujol, Badalona,  
11 Barcelona, Spain

12 <sup>4</sup>Lihir Medical Centre-International SOS, Newcrest Mining, Lihir Island, Papua New Guinea

13 <sup>5</sup>Unit of Health, Sexuality and Human Development and Laboratory of Sexual Health,  
14 Universidad Peruana Cayetano-Heredia, Lima, Peru

15 <sup>6</sup>David Geffen School of Medicine, Division of Infectious Diseases, University of California Los  
16 Angeles, Los Angeles, CA, USA

17 <sup>7</sup>School of Public Health and Administration “Carlos Vidal Layseca”, Universidad Peruana  
18 Cayetano-Heredia, Lima, Peru

19

20 \*Corresponding Author: [giacal@u.washington.edu](mailto:giacal@u.washington.edu)

21 Short title: transcriptional analysis of *tprL*

22

23

## 24 **Abstract**

25           **Background.** An effective syphilis vaccine should elicit antibodies to *Treponema*  
26 *pallidum* subsp. *pallidum* (*T. p. pallidum*) surface antigens to induce pathogen clearance through  
27 opsonophagocytosis. Although the combination of bioinformatics, structural, and functional  
28 analyses of *T. p. pallidum* genes to identify putative outer membrane proteins (OMPs) resulted in  
29 a list of potential vaccine candidates, still very little is known about whether and how  
30 transcription of these genes is regulated during infection. This knowledge gap is a limitation to  
31 vaccine design, as immunity generated to an antigen that can be down-regulated or even silenced  
32 at the transcriptional level without affecting virulence would not induce clearance of the  
33 pathogen, hence allowing disease progression.

34           **Principal findings.** We report here that *tp1031*, the *T. p. pallidum* gene encoding the  
35 putative OMP and vaccine candidate TprL is differentially expressed in several *T. p. pallidum*  
36 strains, suggesting transcriptional regulation. Experimental identification of the *tprL*  
37 transcriptional start site revealed that a homopolymeric G sequence of varying length resides  
38 within the *tprL* promoter and that its length affects promoter activity compatible with phase  
39 variation. Conversely, in the closely related pathogen *T. p. subsp. pertenue*, the agent of yaws,  
40 where a naturally-occurring deletion has eliminated the *tprL* promoter region, elements necessary  
41 for protein synthesis, and part of the gene ORF, *tprL* transcription level are negligible compared  
42 to *T. p. pallidum* strains. Accordingly, the humoral response to TprL is absent in yaws-infected  
43 laboratory animals and patients compared to syphilis-infected subjects.

44           **Conclusion.** The ability of *T. p. pallidum* to stochastically vary *tprL* expression should be  
45 considered in any vaccine development effort that includes this antigen. The role of phase  
46 variation in contributing to *T. p. pallidum* antigenic diversity should be further studied.

## 47 **Author Summary**

48 Syphilis is still an endemic disease in many low- and middle-income countries and has  
49 been resurgent in high-income nations for almost two decades now. In endemic areas, syphilis  
50 still causes significant morbidity and mortality in patients, particularly when its causative agent,  
51 the bacterium *Treponema pallidum* subsp. *pallidum* is transmitted to the fetus during pregnancy.  
52 Although there are significant ongoing efforts to identify an effective syphilis vaccine to bring  
53 into clinical trials within the decade in the U.S., such efforts are partially hindered by the lack of  
54 knowledge on transcriptional regulation of many genes encoding vaccine candidates. Here, we  
55 start addressing this knowledge gap for the putative outer membrane protein (OMP) and vaccine  
56 candidates TprL, encoded by the *tp1031* gene. As we previously reported for other putative  
57 OMP-encoding genes of the syphilis agent, *tprL* transcription level appears to be affected by the  
58 length of a homopolymeric sequence of guanosines (Gs) located within the gene promoter. This  
59 is a mechanism known as phase variation and often involved in altering the surface antigenic  
60 profile of a bacterial pathogen to facilitate immune evasion and/or adaptation to the host milieu.

61

## 62 **Introduction**

63 Syphilis is a chronic sexually transmitted infection that despite being relatively easy to  
64 prevent, diagnose, and treat, still represents a burden for public health as it causes significant  
65 morbidity and mortality worldwide. The World Health Organization estimates that syphilis  
66 global prevalence and incidence range between 18 to 36 million cases and between 5.6 to 11  
67 million new cases every year, respectively [1, 2]. Although the majority of those cases occur in  
68 low- and middle-income countries where the disease is endemic, syphilis rates have also been  
69 steadily increasing for two decades in high-income countries, where men who have sex with men

70 (MSM) and HIV-infected populations are affected [3-8]. In the US, for example, the rate of early  
71 syphilis in 2018 was 10.8 cases per 100,000 population, which represents a 414% increase  
72 compared to the 2.1 cases per 100,000 population reported in 2000 [3]. In absence of treatment,  
73 syphilis might progress to affect patients' cardiovascular and central nervous systems, potentially  
74 leading to aortic aneurism, stroke, hearing or visual loss, dementia, and paralysis [9].  
75 Furthermore, mother-to-child transmission of the infection during pregnancy accounts for up to  
76 50% of stillbirths in sub-Saharan Africa and a high proportion of perinatal morbidity and  
77 mortality cases [10]. Additionally, in the US, the recent syphilis rate increase in women of  
78 reproductive age led to an increase in congenital syphilis cases from 362 cases in 2013 to 1,306  
79 in 2018 [3]. Lastly, evidence that syphilis causes an approximate 5-fold increase in the likelihood  
80 of HIV transmission and acquisition [11] further highlights the threat posed by this disease to  
81 global health.

82 Overall, syphilis epidemiology supports the necessity for an effective vaccine to help  
83 disease control. Ongoing vaccine development efforts aim to elicit opsonic antibodies that target  
84 conserved surface epitopes of putative outer membrane proteins (OMPs) of the syphilis agent,  
85 the spirochete bacterium *Treponema pallidum* subsp. *pallidum* (*T. p. pallidum*), and confer  
86 sterilizing immunity by promoting opsonophagocytosis of *T. p. pallidum* by IFN $\gamma$ -activated  
87 macrophages [12, 13]. That strategy, however, finds an obstacle in our limited knowledge of how  
88 this spirochete controls transcription of genes encoding vaccine candidates. Such knowledge is  
89 however pivotal to devising an effective vaccine, as antibodies generated against an antigen  
90 whose expression can be downregulated or even abrogated without affecting pathogen virulence  
91 or viability would be ineffective in clearing organisms not expressing the target. The only  
92 published high-throughput study that investigated the *T. p. pallidum* transcriptome used

93 microarrays to provide a snapshot of the level of expression of OMP-encoding *T. p. pallidum*  
94 genes in treponemes harvested at peak orchitis from a rabbit infected with the Nichols strain, but  
95 could not address the topic of gene regulation [14]. Our past studies, on the other end, although  
96 limited to a subset of OMP-encoding genes, have suggested that transcription of several of those  
97 genes can be affected by a homopolymeric tract of guanines (poly-G) of varying length located  
98 within the gene promoter [15, 16]. Only a poly-G length of eight or fewer nucleotides, for  
99 example, was permissive for transcription of the genes encoding the *T. pallidum* repeat (Tpr) E,  
100 G, and J putative porins [16], while the poly-G associated with *tp0126* gene (encoding an OmpW  
101 homolog) and located between the -35 and -10 consensus sequences of the *tp0126* promoter,  
102 allowed optimal gene transcription when its length brought the overall distance between the -35  
103 and -10 sites to 17 nucleotides, which is known to be optimal for RNA polymerase binding [15].

104       Transcriptional changes induced by stochastic expansion and contraction in length of  
105 repetitive sequences, such as homomonomeric or homodimeric repeats are collectively known as  
106 phase variation, a mechanism used by pathogenic bacteria to rapidly create phenotypic diversity  
107 within a population. When this process influences the expression of surface antigens, like in the  
108 case of Tp0126 or the Tpr proteins [15, 16], it could facilitate immune evasion or perhaps foster  
109 adaptation to diverse host microenvironments. An example is the variable expression of opacity  
110 (Opa) proteins in *Neisseria meningitidis*, reported to change the pathogen's tropism for human  
111 epithelium, endothelium, and phagocytic cells [17]. In *T. p. pallidum*, the presence of a poly-G  
112 upstream of an annotated ORFs could, therefore, be an indicator that the gene undergoes phase  
113 variation, particularly if the poly-G localizes within the experimentally determined or predicted  
114 gene promoter. Additionally, like in the case of the Tp0126 ORF, the experimental assessment of  
115 the poly-G position in relation to the gene transcriptional start site (TSS) allowed us to redefine

116 the length of the ORF and identify a putative NH<sub>2</sub>-terminal cleavable signal peptide previously  
117 embedded within the larger reading frame originally but mistakenly annotated. Such finding  
118 supported Tp0126 as a novel OMP, and allowed its identification as an OmpW homolog of the  
119 syphilis spirochete. A poly-G is also reported upstream of the *tp1031* gene, encoding the Tpr  
120 protein, TprL, which is significantly conserved among syphilis strains and subspecies and hence  
121 a possible vaccine candidate.

122 In the current study, we investigated the role of the *tprL*-associated poly-G in  
123 transcription of this gene after redefining the boundaries of this ORF. Additionally, we compared  
124 *tprL* transcription in *T. p. pallidum* to an isolate of *T. p. pertenue* (the Gauthier strain), the  
125 spirochete agent of the endemic treponematoses yaws [18]. Although nearly identical to the  
126 syphilis spirochete at the genomic level, *T. p. pertenue* strains carry a 378-bp deletion that  
127 eliminates the poly-G upstream of the *tprL* gene as well as the annotated gene start codon (SC),  
128 providing a naturally-occurring mutant for our studies, given that the agents of human  
129 treponematoses cannot be genetically altered. Finally, we compared the humoral response to  
130 TprL in rabbits and patients infected with the agents of syphilis and yaws to gain insight into  
131 whether TprL is produced by the yaws agent.

132

## 133 **Materials and Methods**

### 134 **Ethics Statement.**

135 Only male New Zealand White (NZW) rabbits ranging from 3.5-4.5 Kg were used in our  
136 studies. Specific pathogen-free (SPF; *Pasteurella multocida*, and *Treponema paraluis-cuniculi*)  
137 animals were purchased from Western Oregon Rabbit Company (Philomath, OR) and housed at  
138 the University of Washington (UW) Animal Research and Care Facility (ARCF). Care was

139 provided in accordance with the procedures described in the Guide for the Care and Use of  
140 Laboratory Animals [19] under protocols approved by the UW Institutional Animal Care and  
141 Use Committee (IACUC; Protocol # 4243-01, PI: Lorenzo Giacani). However, because only  
142 random animals were tested for *T. paraluiscuniculi* infection by the vendor, all rabbits were bled  
143 and tested with a treponemal (FTA-ABS, Trinity Biotech, Bray, Ireland) and a non-treponemal  
144 test (VDRL, Becton Dickinson, Franklin Lakes, NJ) upon arrival at the ARCF and prior to use.  
145 Both tests were performed according to the manufacturer instructions, with the exception that a  
146 secondary FITC-labelled goat anti-rabbit IgG was used instead of the anti-human secondary for  
147 the FTA-ABS test. Only seronegative rabbits were used.

148 Human serum specimens from yaws- and syphilis-infected patients were obtained as de-  
149 identified samples and did not require IRB approval. More specifically, twenty-five sera from  
150 serologically confirmed (RPR, TPPA and/or EIA) syphilis-infected patients were collected by  
151 the King County Public Health (KCPH) laboratory at Harborview Medical Center in 2020. All  
152 but one sample were tested by RPR and yielded titers ranging between 1:4 and 1:512. Sera from  
153 serologically confirmed (RPR, TPPA and/or EIA) yaws-infected patients (n=25) were collected  
154 by Dr. Oriol Mitjá while leading the WHO-sponsored yaws elimination campaign in Lihir Island,  
155 Papua New Guinea [20].

156

### 157 **Experimental infections and nucleic acid extraction**

158 Three *T. p. pallidum* strains (Nichols, Chicago, and Seattle 81-4), and one *T. p. pertenue*  
159 (Gauthier) strain were propagated by means of intratesticular infection as previously reported [21].  
160 Rabbits were infected with  $2 \times 10^7$  *T. pallidum* per testis for Nichols and Chicago, and  $5 \times 10^6$  organisms  
161 per testis for Seattle 81-4, and Gauthier. Treponemes were harvested at peak orchitis (approximately day

162 10 post-infection for the Nichols and Chicago strains; day 20 for Seattle 81-4, and Gauthier) to recover  
163 organisms prior to immune clearance. Briefly, testes were minced in 10 ml of saline and shaken for 5  
164 min. Suspensions were spun for 10 min at 1,000 rpm in a 5430 Eppendorf centrifuge (Eppendorf,  
165 Hauppauge, NY) to remove host cellular debris. For RNA and DNA isolation, 1-ml aliquots were spun  
166 for 30 min at 12,000 rpm at 4°C and the pellets resuspended in 400 µl of Trizol buffer (Thermo Fisher  
167 Scientific, Waltham, MA) or 400 µl of DNA lysis buffer (5 mM Tris, pH 8.0; 50 mM EDTA; 0.25%  
168 SDS), respectively. For the analysis of the length of the poly-G associated to the *tprL* (*tp1031*) ORF,  
169 DNA was isolated as previously described [22] using the QIAamp DNA Mini Kit (Qiagen Inc.,  
170 Chatsworth, CA). RNA extraction was performed following Trizol manufacturer's instructions. Prior to  
171 reverse transcription, total RNA samples were treated with DNase I (Thermo Fisher Scientific). DNA-  
172 free RNA was checked for residual DNA contamination by qualitative amplification using primers  
173 specific for the *tp0574* gene encoding the 47 kDa lipoprotein (Sense primer 5' - cgtgtggtatcaactatgg, and  
174 antisense primer 5' - tcaaccgtgtactcagtgc, conserved in all strains) as already described [23]. Reverse  
175 transcription (RT) of total RNA was performed using the Superscript III First Strand Synthesis Kit  
176 (Thermo Fisher Scientific) with random hexamers according to the provided protocol. cDNA samples  
177 were diluted 1:5 with molecular grade water and stored in single-use aliquots at -80°C until use.

178 Intradermal (ID) experimental infections to assess development of humoral immunity to  
179 recombinant TprL (TprL) over time were performed on a total of four rabbits. Two rabbits were infected  
180 with the Nichols strain in six sites on their shaved backs, and two with the Gautier strain immediately  
181 after harvesting from a routine intratesticular strain passage. Each site received 10<sup>6</sup> spirochetes. Blood  
182 was collected from these rabbits at regular intervals for ~90 days. Extracted serum was heat-inactivated  
183 at 56°C for 30 min and stored at -20°C until use.

184



185           **Quantification of *tprL* message by RT-qPCR**

186           A relative quantification protocol using external standards was used to analyze the *tprL* message  
187 level at the time of bacterial harvest from rabbit testes. This approach normalizes the amount of message  
188 from the *tprL* gene to that of the *tp0574* gene, used as housekeeping gene. To obtain the standards,  
189 sequences of the *tprL* and *tp0574* genes were amplified from Nichols DNA using primers conserved  
190 across all strains and cloned into a pCRII-TOPO vector (Thermo Fisher Scientific). For *tprL*, sense and  
191 antisense primers 5`- ataagaatgcggccgcggtggttccattggaagg and 5`-  
192 ataagaatgcggccccaagtagtctgtaagctgcctg (amplicon size: 295 bp) were used, while for *tp0574*, the same  
193 primers listed in the above paragraph were used (amplicon size: 313 bp). The *tp0574* amplicon was  
194 directly cloned into the vector TA site, while the *tprL* amplicon was cloned using the NotI restriction site  
195 (underlined in primer sequences. Resulting construct was linearized by EcoRV digestion, and standard  
196 curves were generated by serially diluting the plasmid (tenfold) over the 10<sup>6</sup>-10<sup>0</sup> copies/μl concentration  
197 range. The threshold value for the maximum acceptable error associated with a standard curve was set to  
198 0.05. Amplification reactions and data collection were carried out on a Roche LightCycler (Basel,  
199 Switzerland). All reactions were performed following the manufacturer's instructions with the Roche  
200 FastStart Universal SYBR Green Master Kit (Roche). The same primers reported above for *tp0574* and  
201 *tprL* (but without restriction tags in the latter case) were used for the qPCR. Amplifications were  
202 performed with three microliters of the final cDNA preparation in quadruplicate. Amplification  
203 conditions for *tp0574* were: annealing at 60°C for 8 sec following hot start, and extension for 13 s at  
204 72°C. Amplicon melting temperature was 88°C. Amplification conditions for *tprL* were: annealing at  
205 62°C for 6 s following hot start, and extension for 12 s at 72°C. Amplicon melting temperature was  
206 90°C. Differences between levels of *tprL* expression within strains were compared using Students t-test,  
207 with significance set at  $p < 0.05$ .

208 **Identification of the *tprL* transcriptional start site**

209 Rapid Amplification of cDNA Ends (5'-RACE, Thermo Fisher Scientific) was used to  
210 determine the *tprL* gene transcriptional start site (TSS) and infer the location of the *tprL*  
211 promoter. 5'-RACE was performed on total RNA from *T. p. pallidum* Nichols Seattle and *T. p.*  
212 *pertenue* Gauthier strains following the kit manufacturer's instructions. For each strain the  
213 procedure was carried on in duplicate using the same template RNA. Briefly, for the initial  
214 reverse transcription step, 1 µg of sample RNA and 2.5 pmoles of a first *tprL*-specific antisense  
215 primer (5'-gtcaggtagcgcgttagca) were used for reverse transcription, which was followed by dC-  
216 tailing of the cDNA. The subsequent amplifications were performed using five microliters of dC-  
217 tailed cDNA in 50 µl final volume containing 2.5 units of GoTaq polymerase (Promega), 200  
218 µM of each dNTP, 1.5 mM of MgCl<sub>2</sub>, and 400 nM of a second *tprL*-specific antisense primer  
219 (5'-ggagcgttgcttcaaagac) annealing upstream of the one used for first-strand synthesis and the  
220 provided Abridged Anchor Primer. Cycling parameters were initial denaturation (94°C) and final  
221 extension (72°C) for 10 min each. Denaturation (94°C), annealing (60°C) and extension (72°C)  
222 steps were carried on for 1 min each for a total of 45 cycles. PCR products were purified  
223 QIAquick PCR Purification Kit (Qiagen) and cloned into the pCRII-TOPO-TA vector (Thermo  
224 Fisher Scientific) according to instructions. For each cloning reaction, plasmid DNA from at  
225 least ten colonies was extracted using the Plasmid Mini Kit (Qiagen) and sequenced with vector-  
226 specific sense and antisense primers. Sequence data were analyzed using Bioedit, available at  
227 <https://bioedit.software.informer.com/>.

228

229

230

231 **Analysis of the *tprL*-associated poly-G length**

232 A DNA fragment of 292 bp containing the *tprL*-associated poly-G repeat was amplified  
233 for fluorescent fragment length analysis (FFLA), a method already used to evaluate the  
234 variability of poly-G tracts upstream of *T. p. pallidum* genes among and within isolates [15].  
235 Briefly, amplification was performed using a 6-NED-labeled sense primer (5'-  
236 cacggggcgatacaaaaactc) and an unlabeled antisense primer (5'- gtttcttcctcccgaccatttcatt).  
237 Amplifications were performed in 50  $\mu$ l final volume using 2 U of AccuPrime *Pfx* Polymerase  
238 (Thermo Fisher Scientific) and 100 ng of DNA template in each reaction. Mix was also supplied  
239 with primers, MgSO<sub>4</sub>, and dNTPs at final concentrations of 300 nM each, 1 mM, and 300  $\mu$ M,  
240 respectively. Amplifications were carried on for 45 cycles, with denaturation (94°C), annealing  
241 (60°C) and extension (68°C) times of 30 sec, 30 sec, and 1 min, respectively. Initial denaturation  
242 (94°C) and final extension (68°C) steps were of 10 min each. For each strain, two independent  
243 amplifications were performed using the same template DNA. Amplification products were  
244 purified using the QIAquick PCR Purification Kit (Qiagen). Concentrations were measured  
245 spectrophotometrically and all samples diluted to 0.2 ng/ $\mu$ l final concentration. One microliter of  
246 each sample was mixed with 15.4  $\mu$ l of highly deionized formamide and 0.1  $\mu$ l of HD400 ROX-  
247 labeled DNA size marker (both reagents from Thermo Fisher Scientific).

248 Samples were transferred to a 96-well plate and denatured by incubation at 94°C for 2  
249 min, and loaded onto an ABI3730xl DNA analyzer (Thermo Fisher Scientific) to be separated by  
250 capillary electrophoresis. Electropherograms were analyzed using the GeneMapper 4.0. Data on  
251 amplicon length (determined by comparison to the ROX-labeled marker) and intensity  
252 (measured as area under a peak) were collected to evaluate the proportion of amplicons with  
253 poly-G's of different length within each sample. For each amplification, FFLA was performed in

254 triplicate. For data analysis, the sum of the area underneath all peaks generated by amplicons  
255 with the same number of G's was divided by the total area underneath all peaks.

256

### 257 **GFP reporter assay**

258 The *tprL* promoter was amplified using the sense and antisense primers 5'-  
259 cccctgtctacctgagga and 5'- gcatggtgcagttcctccc, respectively and cloned into the pGlow-TOPO  
260 TA vector (Thermo Fisher Scientific), carrying a promoter-less GFP reporter gene. Primers were  
261 designed to include the putative TprL start codon as the first codon of the GFP ORF.  
262 Amplification was performed in 50 µl final volume using 2 U of GoTaq Polymerase (Promega)  
263 and 100 ng of DNA template in each reaction, and carried out for 45 cycles, with denaturation  
264 (94°C), annealing (60°C) and extension (68°C) times of 30 sec. Initial denaturation (94°C) and  
265 final extension (68°C) steps were of 10 min each. Amplification products were cloned directly  
266 into the pGlow-TOPO vector according to the manufacturer's instructions. Amplicon included  
267 90 nt upstream of the poly-G tract to include the *tprL* promoter, and a putative ribosomal binding  
268 site (RBS, GGAG) located 4 nucleotides upstream of the TprL predicted start codon. With the  
269 exception of the start codon, no other TprL codons were present in the constructs. Expression of  
270 GFP from these constructs resulted in the addition of nine extra amino acids to the actual GFP  
271 peptide, encoded by the TprL start codon and eight additional vector-encoded. In total, two  
272 different constructs were obtained for the *tprL* promoter, with poly-G repeats 8 and 10 nt long. A  
273 construct containing the *lac* promoter upstream of the GFP gene was used as a positive control.  
274 As a negative control, to determine background fluorescence, the *tp0547* ORF fragment (the  
275 same used for message quantification purposes, see above) and not predicted to harbor a  
276 promoter or a ribosomal binding site was inserted upstream of the GFP coding sequence of the

277 pGlow-TOPO vector. All constructs were sequenced on both strands to verify sequence accuracy  
278 and correct insert orientation using sanger sequencing. Constructs were then used to transform  
279 TOP-10PE *E. coli* cells (Thermo Fisher Scientific) which do not carry the *lacI* repressor gene.  
280 For GFP fluorescence measurements, cells transformed with the various constructs were  
281 inoculated from a plate into 4 ml of LB-ampicillin (100 µg/ml) broth and grown at 37°C for 4 hr.  
282 Optical density (OD<sub>600</sub>) of all cultures was then measured using a biophotometer (Eppendorf)  
283 and cultures were diluted to identical optical density (0.5 Absorbance Units, AU). Subsequently,  
284 OD<sub>600</sub> and fluorescence were recorded in parallel until cultures reached an OD<sub>600</sub> of ~2 AU. For  
285 fluorescence readings, 400 µl of culture were centrifuged for 4 min at full speed on a tabletop  
286 centrifuge and resuspended in an equal volume of phosphate buffered saline (PBS). Cells were  
287 then divided in three wells (100 µl/well) of a black OptiPlate-96F (Perkin Elmer, Boston, MA)  
288 for top fluorescence reading. Excitation and emission wavelength were 405 and 505 nm,  
289 respectively, and readings were performed in a BioTek Synergy Microplate Reader (BioTek,  
290 Winooski, VT). Reported data represent fluorescence (expressed in Arbitrary Units, A.U.)  
291 normalized to the optical density of the culture. Background fluorescence values were obtained  
292 using *E. coli* cells transformed with the reporter vector containing the promoterless *tp0574* ORF  
293 fragment. Differences in levels of fluorescence between cultures were compared using Student's  
294 t-test, with significance set at  $p < 0.05$ .

295

### 296 **ELISA with recombinant TprL and Tp0574 antigens**

297 A *tprL* gene, devoid of signal peptide and codon-optimized for expression in *E. coli* was  
298 synthesized by GenScript. The gene was then subcloned into the pET28a(+) vector, between the  
299 BamHI and XhoI sites. Recombinant TprL spanned 489 amino acids. The *tp0574* gene was

300 amplified using the primers sense 5'-tgtggctcgtctcatcatga and antisense 5'-ctgggccactaccttcgcac.  
301 Amplification was performed in 50 µl final volume using 2 U of GoTaq Polymerase (Promega)  
302 and 100 ng of Nichols DNA template. Mix was also supplied with primers, MgSO<sub>4</sub>, and dNTPs  
303 at final concentrations of 300 nM each, 1.5 mM, and 300 µM, respectively. Amplifications were  
304 carried on for 45 cycles, with denaturation (94°C), annealing (60°C) and extension (68°C) times  
305 of 30 sec, 30 sec, and 1 min, respectively. Initial denaturation (94°C) and final extension (68°C)  
306 steps were 10 min each. Amplicon was cloned directly the pEXP-5-NT/TOPO vector (Thermo  
307 Fisher Scientific). Constructs were sequenced prior to expression to ensure lack of amplification  
308 errors in the transgene as well as correct orientation into the vector. For protein expression,  
309 transformed *E. coli* Rosetta2 DE3 pLysS BL21 derivative cells (Sigma-Aldrich, ST. Louis, MO)  
310 were grown at room temperature in auto-inducing media according to Studier *et al.* [24] and  
311 harvested after 3 days of incubation. Purification was performed by nickel affinity  
312 chromatography under denaturing conditions using the Ni-NTA Agarose gravity  
313 chromatography System (Qiagen). Inclusion bodies containing insoluble recombinant proteins  
314 were isolated by successive rounds of sonication and centrifugation, then resuspended in 1X  
315 binding buffer (0.5 M NaCl, 20 mM Tris-HCl, 5 mM imidazole, pH 7.9) containing 6 M urea.  
316 After 1 h incubation in ice, suspensions were centrifuged, and supernatants passed through a 0.45  
317 µm filter. Purification was followed by dialysis against PBS. Products were tested for size and  
318 purity by SDS-PAGE and quantified using a Bicinchoninic Acid Assay kit (Pierce, Rockford,  
319 IL).

320 Purified recombinant TprL in PBS and recombinant Tp0574 (the 47 kDa lipoprotein, as a  
321 positive control antigen), were used to coat the wells of a 96-well flat bottom EIA/RIA microplates  
322 (Corning LifeSciences, Corning, NY). Plates, containing 15 picomoles/well of TprL or Tp0574 protein

323 in 50  $\mu$ l were incubated at 37°C for 2 h and subsequently at 4°C overnight to induce antigen binding to  
324 the test wells. Wells were then washed three times with PBS containing 0.05% Tween-20 (Sigma-  
325 Aldrich), blocked by incubation overnight at 4°C with 200  $\mu$ l of 3% nonfat milk-PBS/well and washed  
326 again the next morning. Ten microliters of each serum (either from *T.p. pallidum* or *T.p. pertenuis*  
327 infected animals or patients) were diluted 1:20 in 1% nonfat milk-PBS and 100  $\mu$ l dispensed into wells.  
328 Sera were incubated over night at room temperature. Wells were then washed three times with PBS  
329 containing 0.05% Tween-20 (Sigma-Aldrich). One hundred microliters of secondary antibody (alkaline  
330 phosphatase-conjugated goat anti-rabbit IgG or goat anti-human IgG, both from Sigma-Aldrich) diluted  
331 1:2,000 in 1% nonfat milk-PBS were then added to each well and the plates incubated for additional 3 h  
332 at room temperature before repeating the washing step. After addition of 50  $\mu$ l of 1 mg/ml para-  
333 nitrophenyl phosphate (Sigma-Aldrich) to each well, plates were developed for 45 min, and read at 405  
334 nm on a BioTek Microplate reader. The mean of background readings (from no antigen control wells)  
335 was subtracted from the mean of triplicate experimental wells for each serum.

336

### 337 **Genome-wide analysis of the poly-G sequence variability in *T. p. pallidum***

338 A previously performed analysis revealed several poly-G tracts ( $\geq 8$  nt) [15] distributed  
339 throughout the *T. p. pallidum* Nichols strain genome [25] associated to as many genes. To  
340 investigate how many of those elements are variable in the *T. p. pallidum* strains used here, and  
341 hence possibly affecting gene expression at the transcriptional or translational level, we applied  
342 the same FFLA technique described above for the *tprL* poly-G to each of these homopolymeric  
343 tracts. Primers are reported in Table 1. Forward primers were labelled with different  
344 fluorophores (FAM, HEX, or NED) to multiplex three targets at the time. Amplification and  
345 separation by capillary electrophoresis were performed as described above for the *tp1031* gene.

346 Table 1. Primers used in this study

| Gene associated to poly-G    | Forward <sup>1</sup> and reverse primer sequences (5'-3') | Amplicon length (bp) | Poly-G position <sup>2</sup> |
|------------------------------|-----------------------------------------------------------|----------------------|------------------------------|
| <i>tp0013</i>                | NED-CGCGTCGTCCTACATAAGT<br>CTGCACACACCATCTCTCCA           | 235                  | -60                          |
| <i>tp0026</i>                | FAM-GTAGTGGAGGGTGTGCTCTT<br>GTTTCTTTTTCCGCAGCAGAGAACAAC   | 215                  | -100                         |
| <i>tp0041-42<sup>3</sup></i> | NED-GGTAACGTGGAAGTGCTCAC<br>GTTTCTTCAGAGACAGCATGCGGTTT    | 190                  | -31                          |
| <i>tp0107</i>                | FAM-TCTAGGAGAGCGAAGGATGC<br>CGTGTAAGGCGATTGGTG            | 242                  | -307                         |
| <i>tp0145</i>                | HEX-ACTTTTACCGCAGCGTGTTT<br>TACCCCTCAAGCACTCTCAC          | 250                  | +1191                        |
| <i>tp0179</i>                | NED-TGTCTGCACTGTCTTCCACA<br>ATCTTCCTCTGTGCCGTGAA          | 238                  | -80                          |
| <i>tp0216</i>                | FAM-GGCTCGATGTGAAGCGTATT<br>ACGTGCATCAAAGTCATCGC          | 202                  | +60                          |
| <i>tp0257</i>                | FAM-AAGGTAGGATCAGCGCTCAG<br>GTTTCTTACTTTTCGAGGCAAAGGTGTG  | 228                  | +29                          |
| <i>tp0279</i>                | NED-TCCGTTTTCTGCCCTGTACT<br>GTTTCTTTCAAGAGCGATGATCACGGT   | 162                  | +7                           |
| <i>tp0347</i>                | FAM-GTTGGTCCCAGTGGTTGTTC<br>GTTTCTTACGACAATGCCAGAAACAC    | 169                  | +99                          |
| <i>tp0379</i>                | HEX-AGCAGGGTTACACGTACGAA<br>GTTTCTTAGCCAAAGATGAGCCTGAGT   | 193                  | -70                          |
| <i>tp0381</i>                | HEX-CCAGCTCACATACATCCCCT<br>GTTTCTTAAAAGACCCGTATCCGCCA    | 176                  | -7                           |
| <i>tp0479</i>                | HEX-TGGCATACTCCTCTTCGCAA<br>CAGCGAGCAAAGAACCTACG          | 180                  | +95                          |
| <i>tp0617</i>                | HEX-TGATGTTCCGTGGTCAGTGT<br>GTTTCTTAACGTACCACCCTCCATGTT   | 184                  | -1                           |
| <i>tp0798</i>                | NED-TGACTGAAGGTTGGCTACGT<br>GATCAAGCCACCAAGACTGC          | 234                  | +826                         |
| <i>tp0969</i>                | FAM-CAGTGGTAGGGACGTTTCAGA<br>CCGCGTACACCAAGACTTTC         | 246                  | +56                          |
| <i>tp0986</i>                | HEX-TGTACACGTCTAGGGGCATC<br>ACCAGGTTACGCGTAAATGC          | 202                  | -7                           |

347 <sup>1</sup>Forward primer is labelled with either NED HEX or FAM

348 <sup>2</sup>Location indicates the position of the first poly-G residue in relation to the gene annotated start  
349 codon. A negative value indicates that the poly-G tract is located upstream of the gene ATG. A  
350 positive value indicates that the poly-G tract is within the gene ORF.

351 <sup>3</sup>TP0041 is a 40-aa-long ORF and might not be real.

352

353

354

355



356           **Analysis of the poly-G sequence variability in *T. p. pallidum* and *in silico* analysis of**  
357 **the extended TprL protein**

358           Of the 17 targets analyzed, 88% was found to be variable in length, while only two did  
359 not appear to be (Fig.5). *In silico* analysis on the extended TprL ORF to support it as a putative  
360 *T. pallidum* OMP was performed using a series of computational tools. Presence of a cleavable  
361 signal peptide was predicted by SignalP 4.1 (<http://www.cbs.dtu.dk/ervices/SignalP/>) [26],  
362 PrediSi (<http://www.predisi.de/>) [27], and LipoP (<http://www.cbs.dtu.dk/services/LipoP/>) [28].  
363 For OM location, we used CELLO [29], PSORTb 3.0 [30], BOMP [31], HHPRED  
364 (<https://toolkit.tuebingen.mpg.de/tools/hhpred>) [32] and PRED-TMBB  
365 (<http://bioinformatics.biol.uoa.gr/PRED-TMBB/>) [33]. Sequence and structural homology of the  
366 TprL ORF to other bacterial proteins was investigated using Phyre2  
367 (<http://www.sbg.bio.ic.ac.uk/~phyre2/html/page.cgi?id=index>) [34], I-TASSER  
368 (<https://zhanglab.ccmb.med.umich.edu/I-TASSER/>) [35] and LOMETS  
369 (<https://zhanglab.ccmb.med.umich.edu/LOMETS/>) [36] using default parameters.

370

371 **Results**

372           **Analysis of *tprL* transcription levels during experimental infection**

373           To examine whether differential expression of the *tprL* gene occurs in *T. pallidum* strains  
374 and subspecies, a real-time qPCR assay was developed to quantitate *tprL* message in treponemal  
375 strains harvested at the same time during experimental infection (peak orchitis). That approach  
376 normalizes the *tprL* message level to that of the *tp0574* gene as previously described [37].  
377 Quantification data showed that *tprL* mRNA is variably expressed in the isolates analyzed here  
378 (Fig.1). Compared to *T. p. subsp. pertenue* (Gauthier strain), all *T. p. subsp. pallidum* strains

379 (Nichols, Chicago, and Seattle 81-4) showed a significantly higher level of *tprL* mRNA ( $p < 0.05$ ;  
380 Fig.1). *tprL* mRNA levels detected in Nichols and Chicago were not significantly different, while  
381 the Seattle 81-4 strain showed the higher message level of this gene (Fig.1) among the syphilis  
382 isolates. This result supported the existence of mechanisms affecting *tprL* transcription.

383

### 384 **Identification of the *tprL* transcriptional start site and analysis of variability of the** 385 ***tprL*-associated poly-G**

386 Upon performing 5'-RACE with *T. p. pallidum* RNA, the *tprL* TSS was identified to be  
387 the fourth nucleotide downstream of the poly-G (Fig.2A). Such finding was similar to what  
388 previously reported for other *tpr* genes paralogous of *tprL* that also carry a poly-G of varying  
389 length upstream of their TSS [16]. We then re-assessed the TprL protein annotation. Analysis of  
390 the sequence downstream of the newly identified TSS allowed us to predict a putative ribosomal  
391 binding site (RBS) and an alternative start codon (SC) for TprL (Fig.2A). Such prediction  
392 extended the previously annotated TprL ORF by 88 codons. More importantly, this additional  
393 sequence was predicted to contain a cleavable signal peptide (aa 1-25, underlined in Fig.2A) by  
394 PrediSi, LipoP, and SignalP, which is necessary for OMP sorting to the bacterial surface [38,  
395 39]. 5'-RACE was also performed using Gauthier total RNA but did not yield any reproducible  
396 result, suggesting that the TSS of the transcript carrying the *tprL* message in Gauthier was not in  
397 proximity of the primers used. Given the location of the poly-G in the *tprL* promoter region, we  
398 then investigated whether this poly-G showed length variability *in vivo* within each syphilis  
399 strain studied here. To this end, we used a FFLA method based on the amplification of the poly-  
400 G repeat with a fluorescent primer and subsequent size separation on a genetic analyzer. The  
401 results are shown in Fig.2B. FFLA showed that the length of the *tprL*-associated poly-G varies *in*

402 *vivo* within each isolate. More specifically, the *tprL*-associated poly-G was shown to contain  
403 homopolymeric tracts varying from 7 to 11 Gs, even though the vast majority of the fragments  
404 contained 9 Gs. Poly-G length distribution between Chicago and Seattle 81-4 strains was found  
405 to be more similar, with a comparable percentage of amplicons containing 8, 9, 10, and 11 Gs,  
406 respectively, while no amplicons containing 7 Gs were detected in either strain (Fig.2B).

407

### 408 **Role of poly-G length in transcription**

409 To investigate whether poly-G repeats of different length would affect the activity of the  
410 *tprL* promoter, we adopted an *E. coli*-based heterologous system that allows monitoring of  
411 expression of a vector-encoded GFP reporter gene placed under the control of the *tprL* promoter  
412 with poly-Gs of different length. This approach was previously used to evaluate the role of poly-  
413 G repeats in transcription of the *tprF*, *I*, *E*, *J*, and *tp0126* genes, which also encode *T. p. pallidum*  
414 putative OMPs [15, 16]. For this study, two different *tprL* promoters (with poly-Gs of 8 and 10  
415 nt, respectively) were tested along with positive and negative controls (the *lac* promoter, and a  
416 promoter-less reporter vector, respectively). Results (Fig.3) showed that higher GFP  
417 fluorescence signal was detected when the *tprL* promoter carried a poly-G of eight residues  
418 compared to 10 G residues, which induced a fluorescence signal slightly above background but  
419 not significantly different. This result supports the hypothesis that *tprL* expression is influenced  
420 by phase variation.

421

### 422 **Humoral response to TprL during experimental and natural infection**

423 Given the apparent lack of elements able to drive translation of TprL in yaws strains, we  
424 hypothesized that only syphilis-infected rabbits and patients would develop humoral immunity to

425 TprL when compared to their yaws-infected counterparts. Therefore, we evaluated sera from  
426 longitudinally infected rabbits and syphilis patients by ELISA using recombinant TprL. ELISA  
427 results using animals infected with the Nichols strain showed limited but detectable reactivity to  
428 TprL, which developed relatively late (day 30) post-inoculation (Fig.4A). A more pronounced  
429 response to TprL was seen in naturally infected patient samples (Fig.4B). As expected, the vast  
430 majority of cases showed a significantly higher reactivity to the Tp0574 antigen, used as a  
431 positive control (Fig.4A-B). Conversely, no reactivity to TprL was seen in sera from yaws-  
432 infected animals or patients, while reactivity to Tp0574 remained readily detectable (Fig.4C-D).  
433 These results suggest that the deletion naturally occurring in yaws isolates upstream of the TprL  
434 ORF might abolish protein expression in this subspecies.

435

## 436 **Discussion**

437         The high global prevalence of syphilis and its resurgence in high-income nations argues  
438 in favor of deepening our knowledge of syphilis pathogenesis with the goal of better  
439 understanding *T. p. pallidum* virulence mechanisms, particularly with regard to its ability to  
440 persist in the host in absence of treatment [9]. Such knowledge might help devise better  
441 strategies for disease control and accelerate vaccine development. Previous studies have clearly  
442 shown that antigenic variation of the OMP TprK plays a major role in *T. p. pallidum* virulence  
443 and survival *in vivo* [40-42]. Phase variation is a second, distinct mechanism that has more  
444 recently been implicated in *T. pallidum* virulence based upon our studies. Phase variation allows  
445 rapid and reversible ON/OFF switching of gene expression at the transcriptional or translational  
446 level to generate phenotypic antigenic diversity during infection. This mechanism is mediated by  
447 rapid changes in length of DNA repeats such as homopolymeric tracts due to slipped-strand

448 mispairing during replication. Such elements affect transcription or translation when located  
449 within a gene promoter or an ORF, respectively. In pathogens such as *N. meningitidis* or *H.*  
450 *pylori*, for example, phase variation influences expression of determinants involved in immune  
451 evasion as well as in adaptation to different host microenvironments [43-45].

452         Here, we studied the poly-G associated to the *tprL* gene to assess whether this gene could  
453 also undergo phase variation. Given that TprL is also a putative OMP and significantly  
454 conserved among strains and subspecies of *T. pallidum*, this study is relevant to inform ongoing  
455 vaccine development efforts. By identifying the TSS of this gene, we first confirmed that the  
456 *tprL* transcript begins over two hundred nucleotides upstream of the annotated protein start  
457 codon [25]. This finding supports that the current annotation of the TprL protein should be  
458 revised, as the TprL coding sequence likely includes 88 additional NH<sub>2</sub>-terminal amino acids,  
459 encoded by nucleotides currently annotated as part of the *tp1030* gene (Fig.2A). Interestingly,  
460 this additional TprL sequence is strongly predicted to contain a cleavable signal peptide, which  
461 further supports TprL as a putative OMP. Previous attempts to identify a signal peptide on the  
462 shorter TprL protein were not successful [38], even though the same studies overall supported  
463 TprL as an OMP based on *in silico* structural homology analysis. Overall, our findings support  
464 the necessity to revise the annotation of *T. p. pallidum* genome using high throughput RNA-seq  
465 approaches, which will provide a more precise annotation of the protein-encoding genes,  
466 intergenic regions, and organization of ORFs in operons. Necessity to re-annotate based on  
467 experimental data was also highlighted by our work on the *tp0126* gene, whose signal peptide  
468 could be predicted only after determination of the gene TSS exactly as for *tprL* [15].

469         In the case of TprL, the newly predicted start would be a CTG codon, based on the  
470 location of the RBS. Although CTG is not among the most commonly utilized start codons in

471 bacteria, this is not an unusual finding in spirochetes. Bulach *et al.* [46], in fact, reported that in  
472 *Leptospira* serovars the frequency of CTG use as a start codon ranges between 17-19%. Another  
473 finding worth noting is that in spite of a large deletion affecting its upstream region (Fig.2A), a  
474 low transcription level for *tprL* could be detected in the *T. p. pertenuae* Gauthier strain (Fig.1). It  
475 is unclear where the genetic elements responsible for generating this transcript reside in the  
476 Gauthier genome, as our attempts to identify them through 5'-RACE failed. However, more  
477 importantly, because no humoral reactivity to TprL was seen in yaws-infected rabbits or patients,  
478 it is possible that the TprL message is not translated in Gauthier and more generally, the yaws  
479 subspecies as a whole. Alternatively, if protein synthesis does occur in yaws treponemes, it  
480 might not generate enough antigen to induce a detectable humoral response. Such a finding  
481 would have direct implications for development of diagnostic tools for yaws. Due to the  
482 aforementioned deletion (shown in Fig.2A), the sequence of the NH<sub>2</sub>-terminal region of TprL is  
483 predicted to diverge from that of syphilis isolates (Fig.2C). Such difference was targeted in the  
484 past to try and devise a serological test to differentiate syphilis from yaws infection whenever  
485 biological specimens were not suitable for molecular analysis of this region. The possibility of  
486 differential diagnosis using TprL-based serological approach, however, could be still feasible  
487 based on our results as this antigen might not be synthesized at all during infection with yaws  
488 strains. A rapid point-of care test where shared antigens are combined with TprL could indeed  
489 help differentiate between these two infections. We acknowledge that the number of patient  
490 specimens used in our study is limited and that we purposely included specimens from patients  
491 with confirmed infection with *T. p. pertenuae* based on molecular analysis, and that our findings  
492 will need further experimental confirmation using a much larger cohort of patient samples.

493 In spite of their many commonalities, the pathogenesis of syphilis and yaws also show  
494 remarkable differences [18]. If the yaws spirochetes lack a putative OMP and virulence factor  
495 such as TprL, as our results here suggest, further studies should try and address the function of  
496 this protein and its possible role in the pathogenesis of these infections. Although we hoped to  
497 gain clues on TprL function by conducting structural homology analyses, obtaining a consistent  
498 model for this protein remains an elusive task, as prediction softwares (Neff-MUSTER, SparksX,  
499 HHpred, and HHsearch, all from the LOMETS package) that identify structural homologs to  
500 TprL with a beta-barrel structure do not agree on any particular structural homolog. Predictions  
501 include electron transport proteins homologous to the Mtr complex of *Shewanella baltica* [47]; a  
502 Type 9 protein translocon homologous to the SprA protein of *Flavobacterium johnsoniae* [48]  
503 which however has a molecular mass three times that of TprL, OmpW of *E. coli* [49], which  
504 however is significantly smaller in size, and a green fluorescent protein of the hydromedusa  
505 *Aequora victoria*. Further experimental work focusing on the analysis of this protein will shed  
506 light on its structure, and provide additional clues to its function and role in disease pathogenesis.  
507 Our analysis of the variability of most poly-G tracts found in the Nichols strain genome (Fig.5),  
508 strongly suggest that phase variation might be a very strong component of the strategy these  
509 spirochetes use to create antigenically distinct cells at the phenotypic level. In our analysis, only  
510 one of the poly-G analyzed here did not vary upon performing amplification and separation, but  
511 most of the others showed a rather significant variability in terms of length. These data will  
512 hopefully provide opportunity to address the role of the genes to which the poly-G is associated  
513 in disease pathogenesis and to the biology of this difficult organism.

514

515

## 516 **Conclusions**

517 Our results support modulation of *tprL* transcription by phase variation and that this gene  
518 might not be functional in yaws treponemes. This information might help vaccine design efforts  
519 to control syphilis spread.

520

## 521 **Acknowledgments**

522 This work was supported by the National Institute for Allergy and Infectious Diseases of  
523 the National Institutes of Health grant numbers R01AI139265 (To J.D. K.) and U19AI144133  
524 Project 2 (Project leader: L.G.; PI: Anna Wald, MD, University of Washington). We are also  
525 grateful to Matthew Golden, MD, MPH for help procuring the syphilis patient sera tested in this  
526 study. The content of this study is solely the responsibility of the authors and does not  
527 necessarily represent the official views of the National Institutes of Health.

528

529

## 530 **References**

- 531 1. WHO. Prevalence and incidence of selected sexually transmitted infections *Chlamydia*  
532 *trachomatis*, *Neisseria gonorrhoeae*, syphilis and *Trichomonas vaginalis*: methods and results  
533 used by WHO to generate 2005 estimates. World Health Organization, Geneva. 2011.
- 534 2. Gerbase AC, Rowley JT, Mertens TE. Global epidemiology of sexually transmitted  
535 diseases. *The Lancet*. 1998;351.
- 536 3. CDC. 2018 Sexually Transmitted Disease Surveillance. Atlanta, GA: US Department of  
537 Health and Human Services: Centers for Disease Control and Prevention. 2019.



- 538 4. Savage EJ, Marsh K, Duffell S, Ison CA, Zaman A, Hughes G. Rapid increase in  
539 gonorrhoea and syphilis diagnoses in England in 2011. *Euro Surveill.* 2012;17(29). PubMed  
540 PMID: 22835469.
- 541 5. Savage EJ, Hughes G, Ison C, Lowndes CM. Syphilis and gonorrhoea in men who have  
542 sex with men: a European overview. *Euro Surveill.* 2009;14(47). PubMed PMID: 19941803.
- 543 6. Simms I, Fenton KA, Ashton M, Turner KM, Crawley-Boevey EE, Gorton R, et al. The  
544 re-emergence of syphilis in the United Kingdom: the new epidemic phases. *Sex Transm Dis.*  
545 2005;32(4):220-6. PubMed PMID: 15788919.
- 546 7. Tucker JD, Cohen MS. China's syphilis epidemic: epidemiology, proximate determinants  
547 of spread, and control responses. *Curr Opin Infect Dis.* 2011;24(1):50-5. PubMed PMID:  
548 21150594.
- 549 8. Jin F, Prestage GP, Kippax SC, Pell CM, Donovan BJ, Kaldor JM, et al. Epidemic  
550 syphilis among homosexually active men in Sydney. *Med J Aust.* 2005;183(4):179-83. PubMed  
551 PMID: 16097913.
- 552 9. LaFond RE, Lukehart SA. Biological basis for syphilis. *Clin Microbiol Rev.*  
553 2006;19(1):29-49. PubMed PMID: 16418521.
- 554 10. Goldenberg RL, Thompson C. The infectious origins of stillbirth. *Am J Obstet Gynecol.*  
555 2003;189(3):861-73. PubMed PMID: 14526331.
- 556 11. Nusbaum MR, Wallace RR, Slatt LM, Kondrad EC. Sexually transmitted infections and  
557 increased risk of co-infection with human immunodeficiency virus. *J Am Osteopath Assoc.*  
558 2004;104(12):527-35. Epub 2005/01/18. PubMed PMID: 15653780.
- 559 12. Cameron CE, Lukehart SA. Current status of syphilis vaccine development: need,  
560 challenges, prospects. *Vaccine.* 2014;32(14):1602-9. PubMed PMID: 24135571.

- 561 13. Bagnoli F, Baudner B, Mishra RP, Bartolini E, Fiaschi L, Mariotti P, et al. Designing the  
562 next generation of vaccines for global public health. *Omic*s. 2011;15(9):545-66. PubMed PMID:  
563 21682594.
- 564 14. Smajs D, McKeivitt M, Howell JK, Norris SJ, Cai WW, Palzkill T, et al. Transcriptome of  
565 *Treponema pallidum*: gene expression profile during experimental rabbit infection. *J Bacteriol*.  
566 2005;187(5):1866-74. PubMed PMID:1063989
- 567 15. Giacani L, Brandt SL, Ke W, Reid TB, Molini BJ, Iverson-Cabral S, et al. Transcription  
568 of TP0126, *Treponema pallidum* putative OmpW homolog, is regulated by the length of a  
569 homopolymeric guanosine repeat. *Infect Immun*. 2015;83(6):2275-89. PubMed PMID:  
570 25802057.
- 571 16. Giacani L, Lukehart S, Centurion-Lara A. Length of guanosine homopolymeric repeats  
572 modulates promoter activity of Subfamily II *tpr* genes of *Treponema pallidum* ssp. *pallidum*.  
573 *FEMS Immunol Med Microbiol*. 2007;51:289-301. PubMed PMID: 3006228
- 574 17. Gray-Owen SD. Neisserial Opa proteins: impact on colonization, dissemination and  
575 immunity. *Scand J Infect Dis*. 2003;35(9):614-8. PubMed PMID: 14620144.
- 576 18. Giacani L, Lukehart SA. The endemic treponematoses. *Clin Microbiol Rev*.  
577 2014;27(1):89-115. PubMed PMID: 24396138.
- 578 19. Janier M. Ceftriaxone is effective for treating patients with primary syphilis. *Sex Transm*  
579 *Dis*. 1988;15(1):70. Epub 1988/01/01. PubMed PMID: 3358241.
- 580 20. Mitjà O, Houinei W, Moses P, Kapa A, Paru R, Hays R, et al. Mass treatment with  
581 single-dose azithromycin for yaws. *N Engl J Med*. 2015;372(8):703-10. Epub 2015/02/19. doi:  
582 10.1056/NEJMoa1408586. PubMed PMID: 25693010.

- 583 21. Baker-Zander SA, Fohn MJ, Lukehart SA. Development of cellular immunity to  
584 individual soluble antigens of *Treponema pallidum* during experimental syphilis. J Immunol.  
585 1988;141(12):4363-9. PubMed PMID: 2461990
- 586 22. Centurion-Lara A, Arroll T, Castillo R, Shaffer JM, Castro C, Van Voorhis WC, et al.  
587 Conservation of the 15-kilodalton lipoprotein among *Treponema pallidum* subspecies and strains  
588 and other pathogenic treponemes: genetic and antigenic analyses. Infect Immun.  
589 1997;65(4):1440-4. PubMed PMID: 175151
- 590 23. Giacani L, Hevner K, Centurion-Lara A. Gene organization and transcriptional analysis  
591 of the *tprJ*, *tprI*, *tprG* and *tprF* loci in the Nichols and Sea 81-4 *Treponema pallidum* isolates. J  
592 Bacteriol. 2005;187(17):6084-93. PubMed PMID: 1196134
- 593 24. Studier FW. Protein production by auto-induction in high density shaking cultures.  
594 Protein Expr Purif. 2005;41(1):207-34. PubMed PMID: 15915565.
- 595 25. Fraser CM, Norris SJ, Weinstock GM, White O, Sutton GG, Dodson R, et al. Complete  
596 genome sequence of *Treponema pallidum*, the syphilis spirochete. Science. 1998;281(5375):375-  
597 88. PubMed PMID: 9665876
- 598 26. Nielsen H. Predicting Secretory Proteins with SignalP. Methods Mol Biol. 2017;1611:59-  
599 73. Epub 2017/04/30. doi: 10.1007/978-1-4939-7015-5\_6. PubMed PMID: 28451972.
- 600 27. Hiller K, Grote A, Scheer M, Münch R, Jahn D. PrediSi: prediction of signal peptides and  
601 their cleavage positions. Nucleic Acids Res. 2004;32(Web Server issue):W375-9. Epub  
602 2004/06/25. doi: 10.1093/nar/gkh378. PubMed PMID: 15215414.
- 603 28. Juncker AS, Willenbrock H, Von Heijne G, Brunak S, Nielsen H, Krogh A. Prediction of  
604 lipoprotein signal peptides in Gram-negative bacteria. Protein Sci. 2003;12(8):1652-62. Epub  
605 2003/07/24. doi: 10.1110/ps.0303703. PubMed PMID: 12876315.

- 606 29. Yu CS, Lin CJ, Hwang JK. Predicting subcellular localization of proteins for Gram-  
607 negative bacteria by support vector machines based on n-peptide compositions. *Protein Sci.*  
608 2004;13(5):1402-6. Epub 2004/04/21. doi: 10.1110/ps.03479604. PubMed PMID: 15096640.
- 609 30. Yu NY, Wagner JR, Laird MR, Melli G, Rey S, Lo R, et al. PSORTb 3.0: improved  
610 protein subcellular localization prediction with refined localization subcategories and predictive  
611 capabilities for all prokaryotes. *Bioinformatics.* 2010;26(13):1608-15. Epub 2010/05/18. doi:  
612 10.1093/bioinformatics/btq249. PubMed PMID: 20472543.
- 613 31. Berven FS, Flikka K, Jensen HB, Eidhammer I. BOMP: a program to predict integral  
614 beta-barrel outer membrane proteins encoded within genomes of Gram-negative bacteria.  
615 *Nucleic Acids Res.* 2004;32(Web Server issue):W394-9. Epub 2004/06/25. doi:  
616 10.1093/nar/gkh351. PubMed PMID: 15215418.
- 617 32. Söding J, Biegert A, Lupas AN. The HHpred interactive server for protein homology  
618 detection and structure prediction. *Nucleic Acids Res.* 2005;33(Web Server issue):W244-8. Epub  
619 2005/06/28. doi: 10.1093/nar/gki408. PubMed PMID: 15980461.
- 620 33. Bagos PG, Liakopoulos TD, Spyropoulos IC, Hamodrakas SJ. PRED-TMBB: a web  
621 server for predicting the topology of beta-barrel outer membrane proteins. *Nucleic Acids Res.*  
622 2004;32(Web Server issue):W400-4. Epub 2004/06/25. doi: 10.1093/nar/gkh417. PubMed  
623 PMID: 15215419.
- 624 34. Kelley LA, Mezulis S, Yates CM, Wass MN, Sternberg MJ. The Phyre2 web portal for  
625 protein modeling, prediction and analysis. *Nat Protoc.* 2015;10(6):845-58. Epub 2015/05/08. doi:  
626 10.1038/nprot.2015.053. PubMed PMID: 25950237.

- 627 35. Yang J, Yan R, Roy A, Xu D, Poisson J, Zhang Y. The I-TASSER Suite: protein  
628 structure and function prediction. *Nat Methods*. 2015;12(1):7-8. Epub 2014/12/31. doi:  
629 10.1038/nmeth.3213. PubMed PMID: 25549265.
- 630 36. Wu S, Zhang Y. LOMETS: a local meta-threading-server for protein structure prediction.  
631 *Nucleic Acids Res*. 2007;35(10):3375-82. Epub 2007/05/05. doi: 10.1093/nar/gkm251. PubMed  
632 PMID: 17478507.
- 633 37. Giacani L, Molini B, Godornes C, Barrett L, Van Voorhis WC, Centurion-Lara A, et al.  
634 Quantitative analysis of *tpr* gene expression in *Treponema pallidum* isolates: differences among  
635 isolates and correlation with T-cell responsiveness in experimental syphilis. *Infect Immun*.  
636 2007;75(1):104-12. PubMed PMID: 1828388
- 637 38. Cox DL, Luthra A, Dunham-Ems S, Desrosiers DC, Salazar JC, Caimano MJ, et al.  
638 Surface immunolabeling and consensus computational framework to identify candidate rare  
639 outer membrane proteins of *Treponema pallidum*. *Infect Immun*. 2010;78(12):5178-94. PubMed  
640 PMID: 20876295.
- 641 39. Centurion-Lara A, Giacani L, Godornes C, Molini BJ, Brinck Reid T, Lukehart SA. Fine  
642 Analysis of Genetic Diversity of the *tpr* Gene Family among Treponemal Species, Subspecies  
643 and Strains. *PLoS Negl Trop Dis*. 2013;16(7):e2222. PubMed PMID: 3656149
- 644 40. LaFond RE, Molini BJ, Van Voorhis WC, Lukehart SA. Antigenic variation of TprK V  
645 regions abrogates specific antibody binding in syphilis. *Infect Immun*. 2006;74(11):6244-51.  
646 PubMed PMID: 16923793.
- 647 41. Giacani L, Molini BJ, Kim EY, Godornes BC, Leader BT, Tantaló LC, et al. Antigenic  
648 variation in *Treponema pallidum*: TprK sequence diversity accumulates in response to immune

- 649 pressure during experimental syphilis. *J Immunol.* 2010;184(7):3822-9. PubMed PMID:  
650 20190145.
- 651 42. Reid TB, Molini BJ, Fernandez MC, Lukehart SA. Antigenic variation of TprK facilitates  
652 development of secondary syphilis. *Infect Immun.* 2014;82(12):4959-67. PubMed PMID:  
653 25225245.
- 654 43. Salaun L, Snyder LA, Saunders NJ. Adaptation by phase variation in pathogenic bacteria.  
655 *Adv Appl Microbiol.* 2003;52:263-301. PubMed PMID: 12964248.
- 656 44. van der Woude MW, Baumberg AJ. Phase and antigenic variation in bacteria. *Clin*  
657 *Microbiol Rev.* 2004;17(3):581-611. PubMed PMID: 15258095.
- 658 45. Saunders NJ. Evasion of antibody responses: bacterial phase variation. In: Oyston  
659 BHPCF, editor. *Bacterial Evasion of Host Immune Responses.* Cambridge: Cambridge  
660 University Press; 2003. p. 103–24.
- 661 46. Bulach DM, Seemann T, Zuerner RL, Adler B. The Organization of *Leptospira* at a  
662 Genomic Level. In: Chan VL, Sherman PM, Bourke B, editors. *Bacterial Genomes and*  
663 *Infectious Diseases.* Totowa, NJ: Humana Press; 2006. p. 109-23.
- 664 47. Edwards MJ, White GF, Butt JN, Richardson DJ, Clarke TA. The Crystal Structure of a  
665 Biological Insulated Transmembrane Molecular Wire. *Cell.* 2020;181(3):665-73.e10. Epub  
666 2020/04/15. doi: 10.1016/j.cell.2020.03.032. PubMed PMID: 32289252.
- 667 48. Lauber F, Deme JC, Lea SM, Berks BC. Type 9 secretion system structures reveal a new  
668 protein transport mechanism. *Nature.* 2018;564(7734):77-82. Epub 2018/11/09. doi:  
669 10.1038/s41586-018-0693-y. PubMed PMID: 30405243.

670 49. Hagn F, Etzkorn M, Raschle T, Wagner G. Optimized phospholipid bilayer nanodiscs  
671 facilitate high-resolution structure determination of membrane proteins. J Am Chem Soc.  
672 2013;135(5):1919-25. Epub 2013/01/09. doi: 10.1021/ja310901f. PubMed PMID: 23294159.

673

## 674 **Figure Legends**

675 **Figure 1.** *tprL* mRNA levels normalized to the *tp0574* message in the *T. p. pallidum* Nichols,  
676 Chicago and Seattle 81-4 strains and in the in the *T. p. pertenue* Gauthier strain harvested at peak  
677 orchitis post-IT inoculation. Asterisk (\*) indicates a significant difference ( $p < 0.05$ ) compared to  
678 the Gauthier strain.

679

680 **Figure 2. (A).** Cartoon depicting the *tprL* ORF as originally annotated in the *T. pallidum* Nichols  
681 strain [25] (blue) showing the location of the homopolymeric G tract (poly-G), the  
682 experimentally determined TSS. Asterisks indicate the newly predicted (\*) TprL ribosomal  
683 binding site (RBS) and start codon (SC) based on the TSS identification. According to this  
684 model, the TprL ORF encompasses 88 additional amino acid residues located upstream of the  
685 annotated SC. Within these residues, a cleavable signal peptide (underlined) is predicted by three  
686 independent programs (SignalP, PrediSi and Lipop). **(B).** Distribution of poly-G lengths in the  
687 Nichols, Chicago, and Seattle 81-4 treponemes at the moment of bacterial harvest determined by  
688 FFLA. **(C)** Comparison of the TprL NH<sub>2</sub>-termini of *T. p. pallidum* and *T. p. pertenue* (Nichols  
689 and Gauthier strains, respectively).

690

691 **Figure 3.** Analysis of the effect of poly-G length on *tprL* transcription. Graph shows  
692 fluorescence induced in *E. coli* TOP-10PE cells transformed with a pGLow-TOPO vector where

693 GFP transcription is under control of the tprL promoters with poly-G tracts of different length (8  
694 and 10 nt). A *lac* promoter –GFP construct was used as a positive control. The *lac* promoter is  
695 recognized by  $\sigma^{70}$  and the *E. coli* strain used for this assay does not carry the gene that encodes  
696 the LacI repressor. Background fluorescence collected from *E. coli* cells transformed with a  
697 pGLow-TOPO vector that carries a fragment of *T. pallidum* Tp0574 ORF with no promoter is  
698 also shown. Asterisk (\*) indicates significance compared to background fluorescence level (No  
699 promoter-GFP sample).

700

701 **Figure 4.** Humoral reactivity to TprL in experimental and clinical samples. **(A)** Pooled sera from  
702 rabbits (n=2) infected with *T. p. pallidum* Nichols strain, and **(B)** individual sera from syphilis-  
703 infected patients. **(C)** Pooled sera from rabbits (n=2) infected with *T. p. pertenue* Gauthier strain,  
704 and **(D)** individual sera from yaws-infected patients. Optical density from test sera in absence of  
705 target antigen was used for background subtraction.

706

707 **Figure 5.** Analysis of poly-G tracts not already studied found throughout the *T. p. pallidum*  
708 genome. Because human treponematoses spirochetes have GC-rich genomes (~52.8%), and  
709 poly-G tracts are common, we only selected those showing an initial length  $\geq 8$  nt.

710

711

712

713



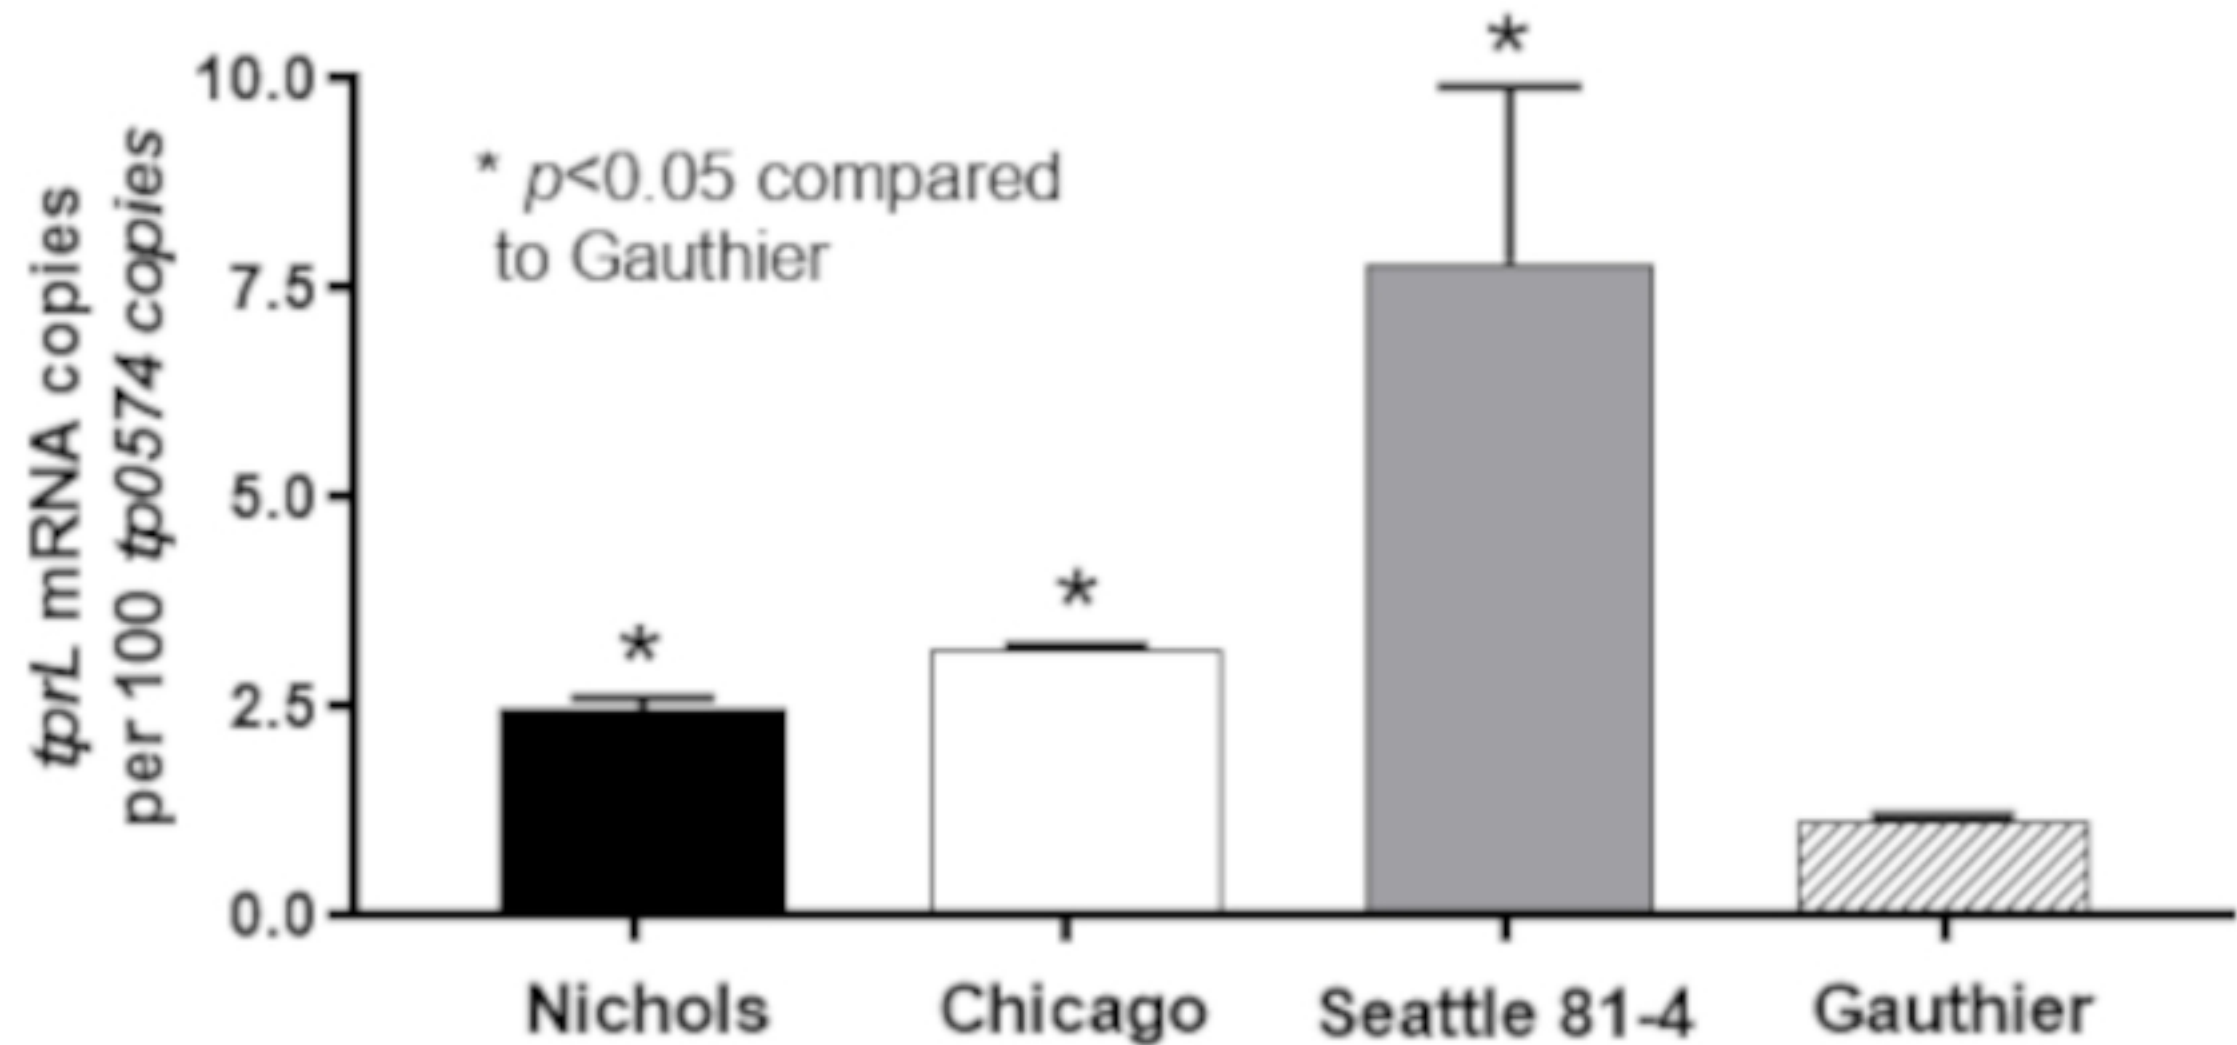

Figure 1

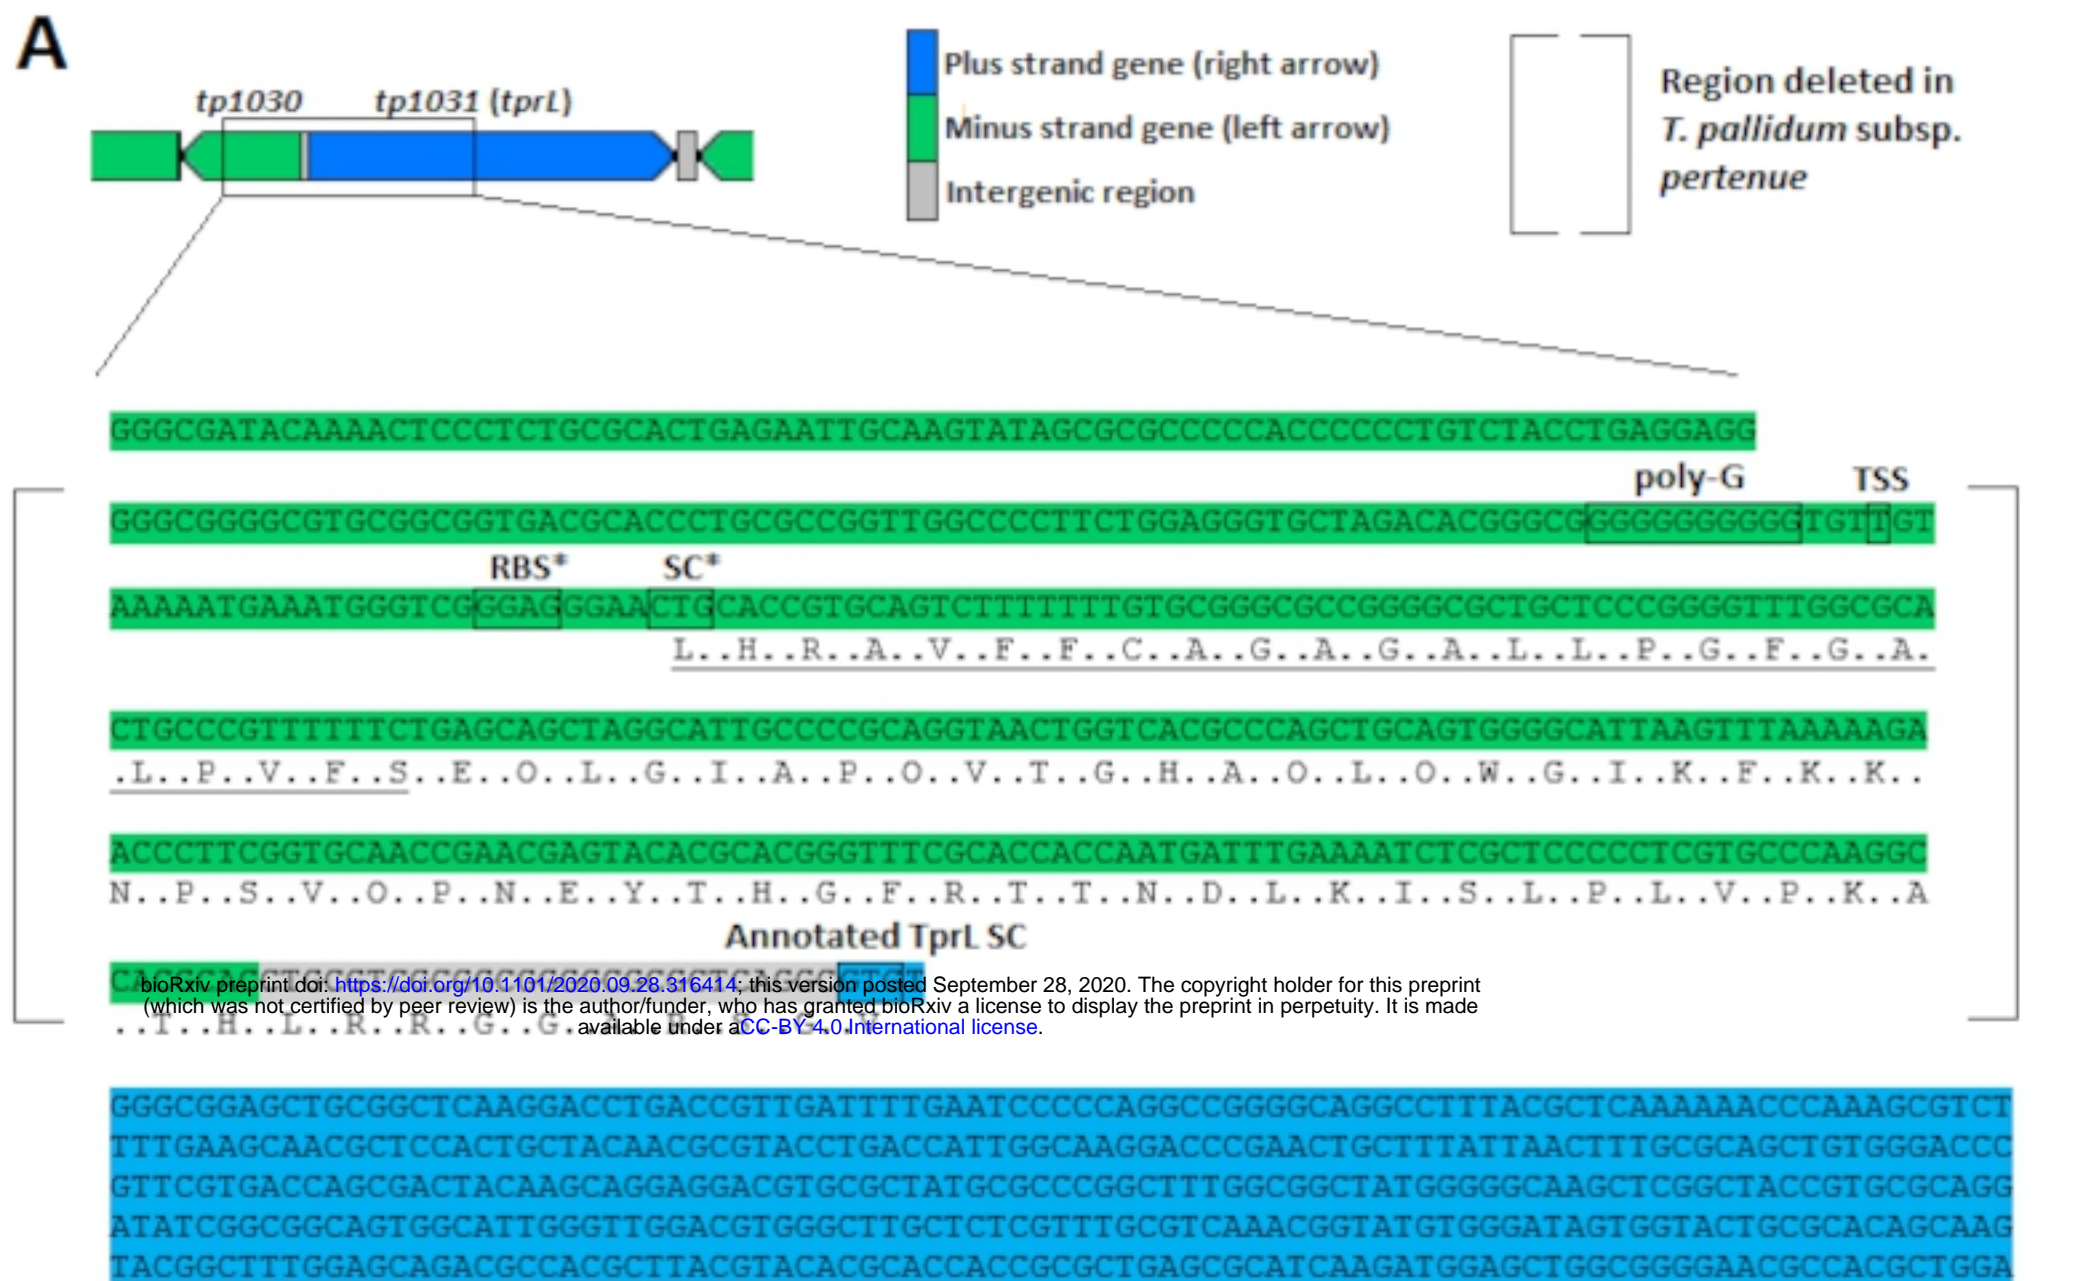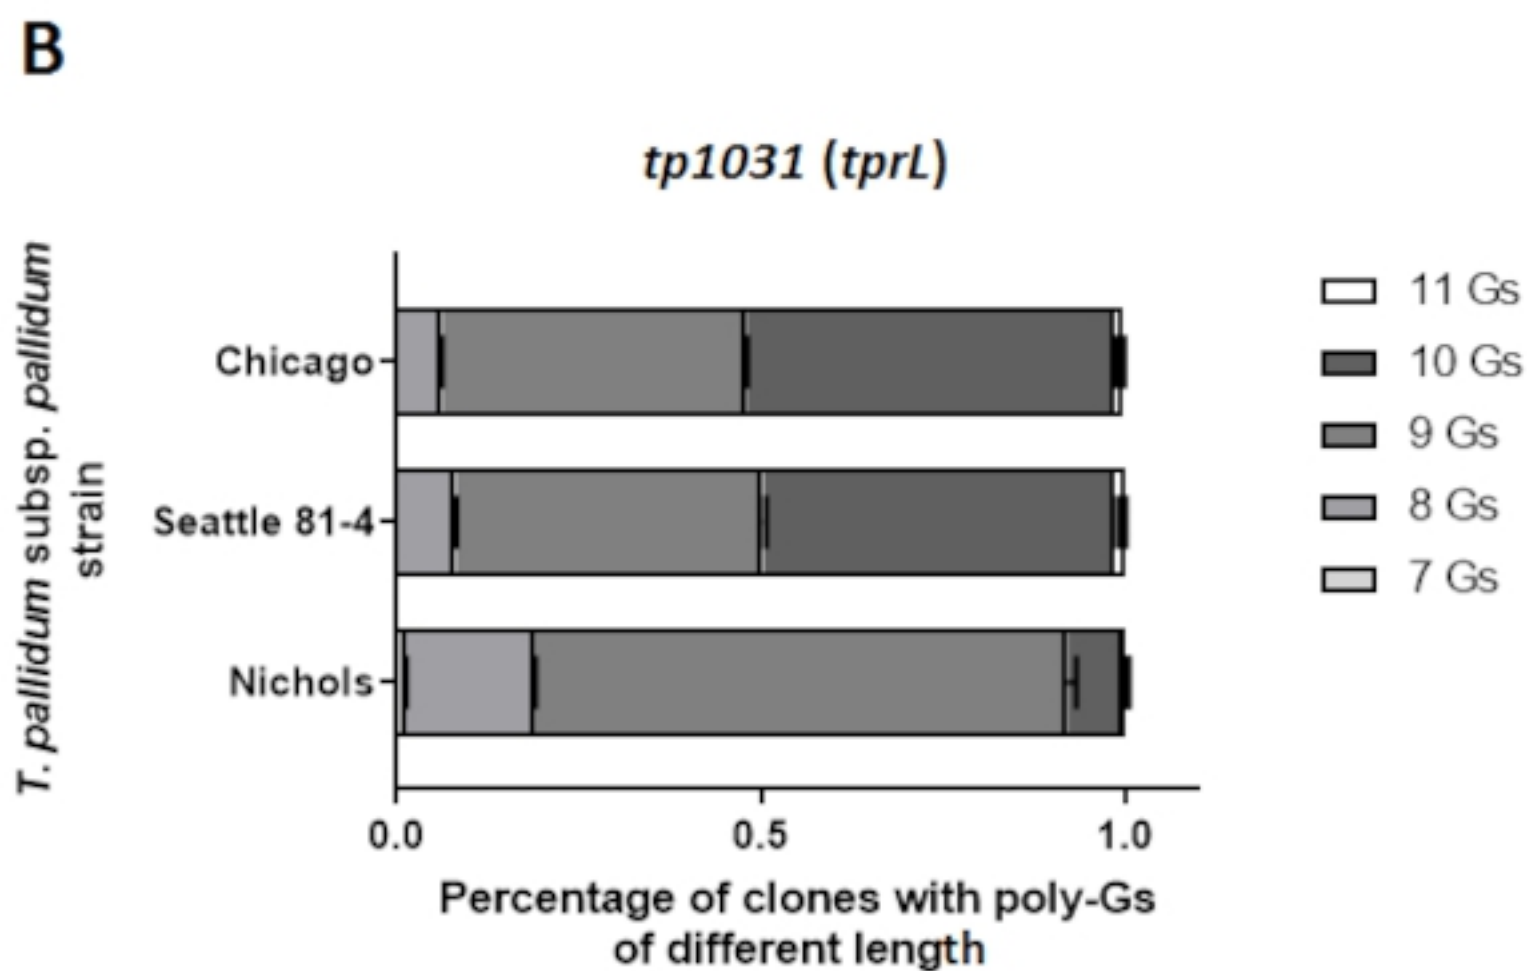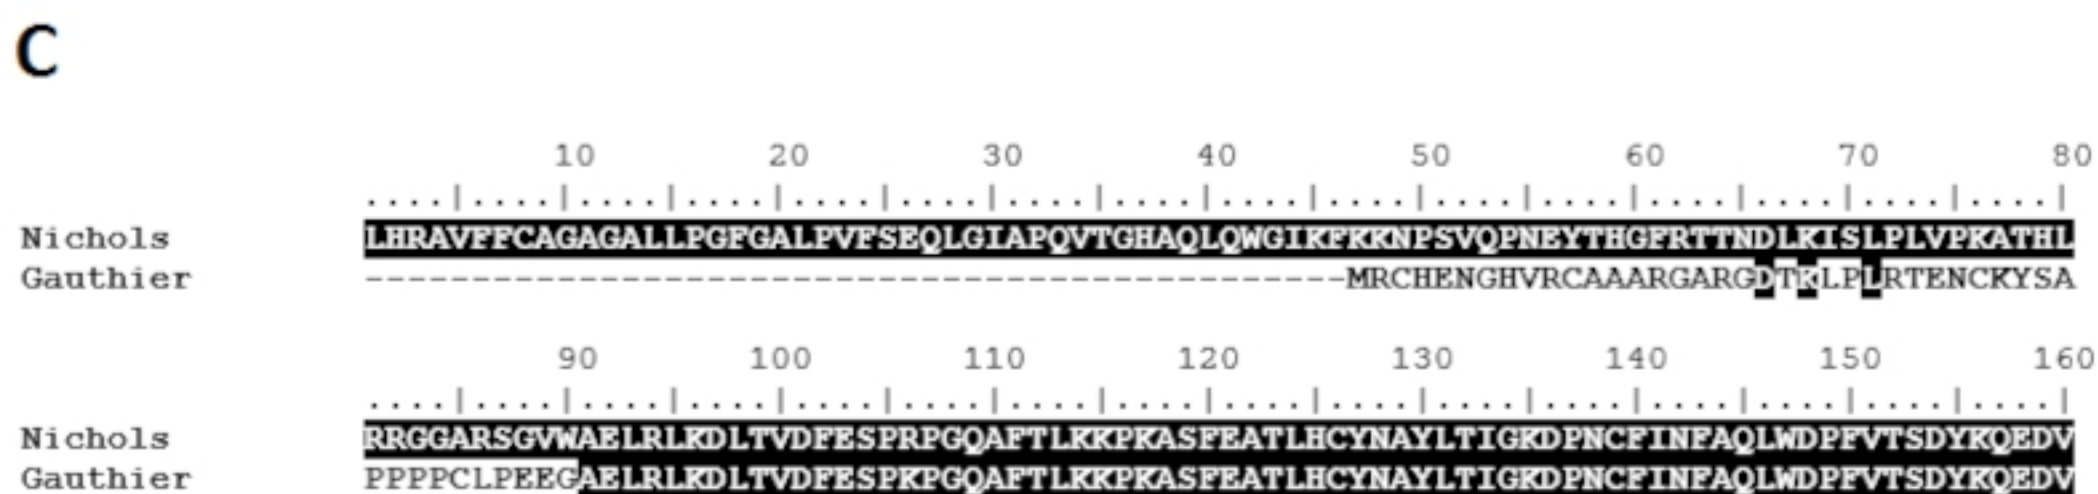

Figure 2

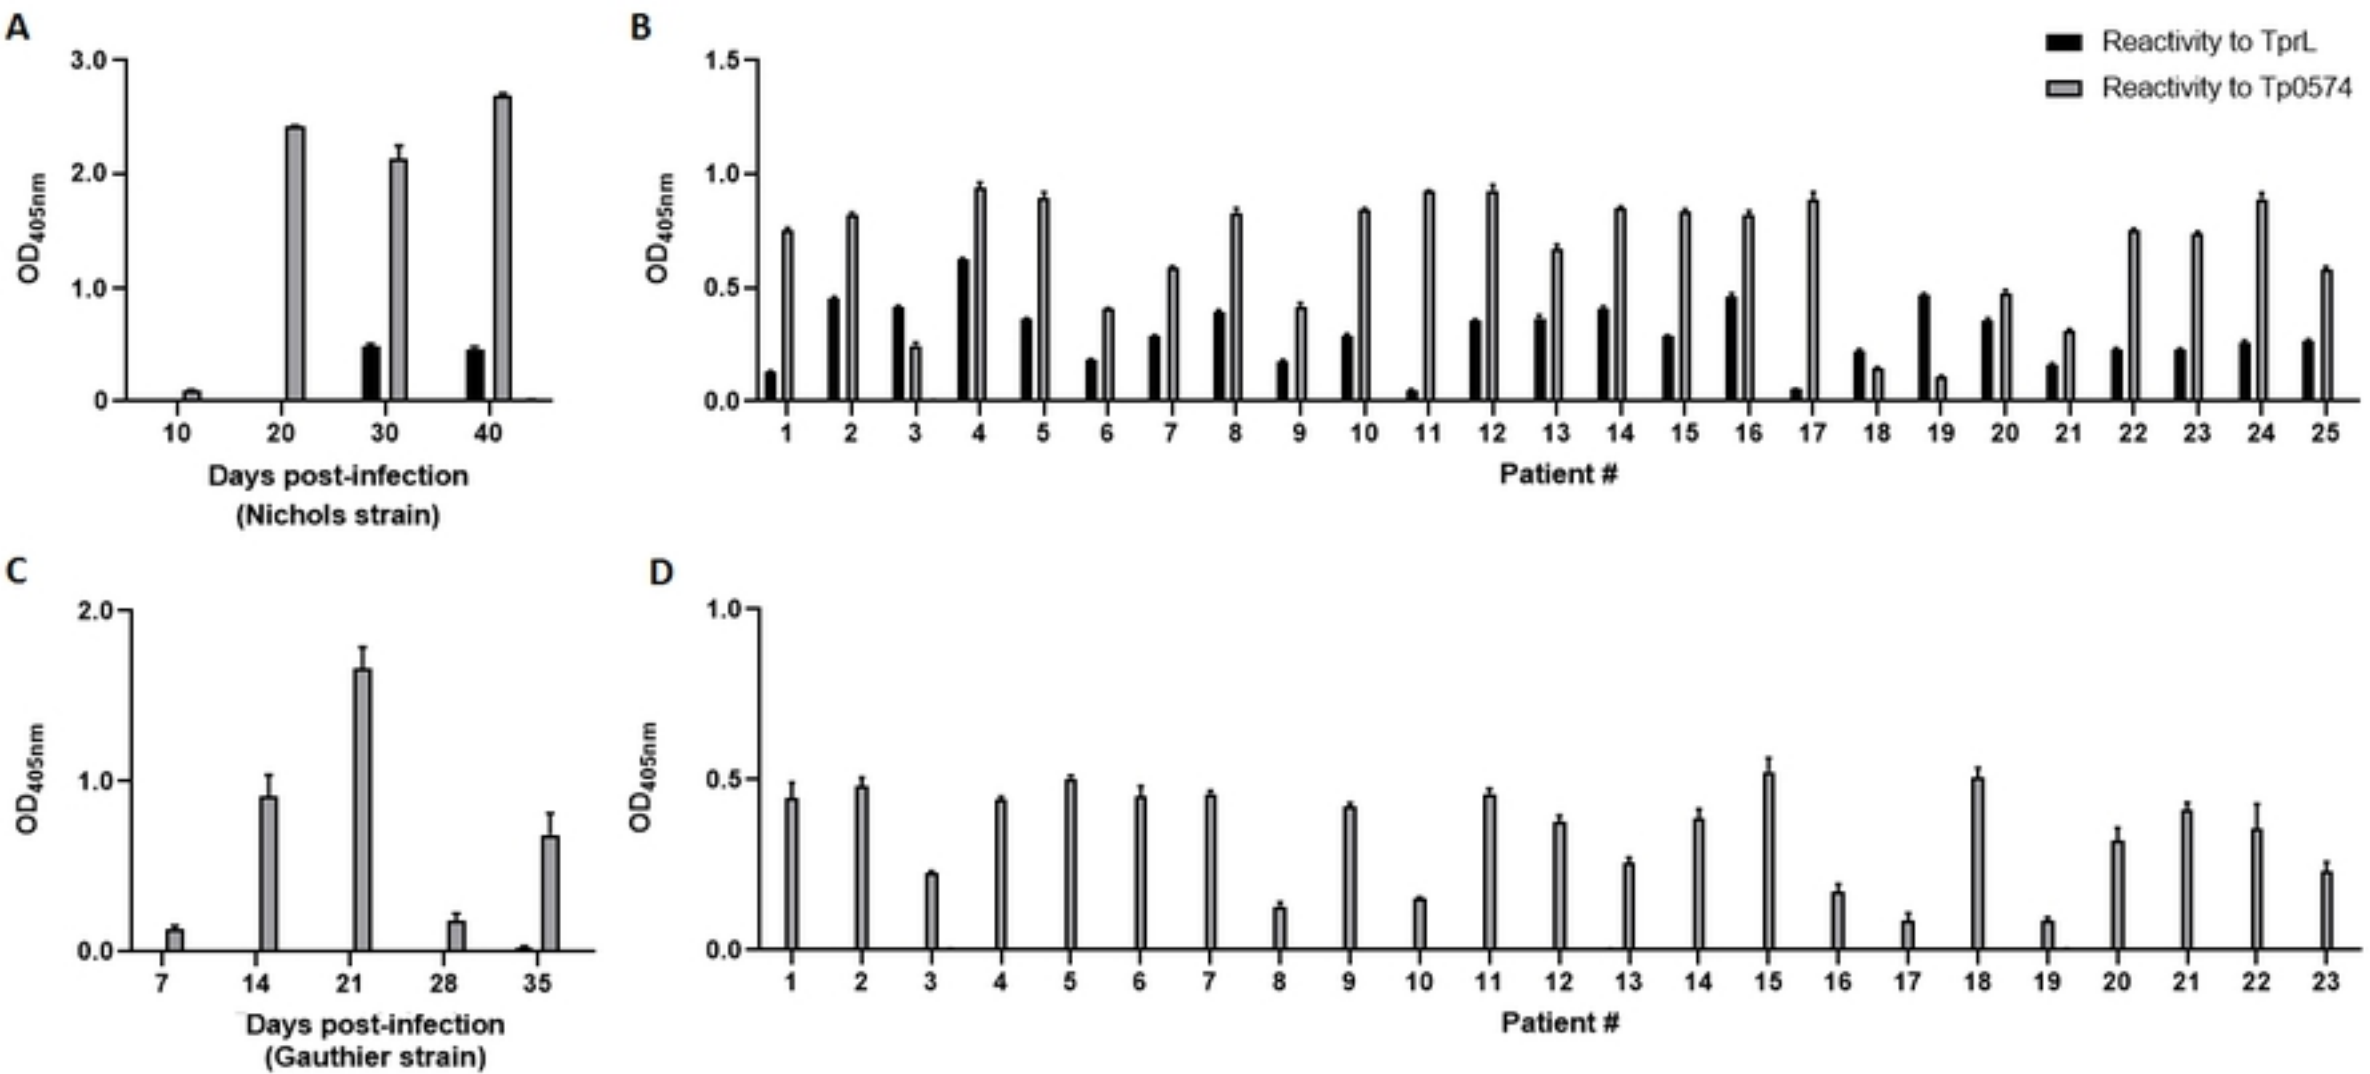

Figure 4

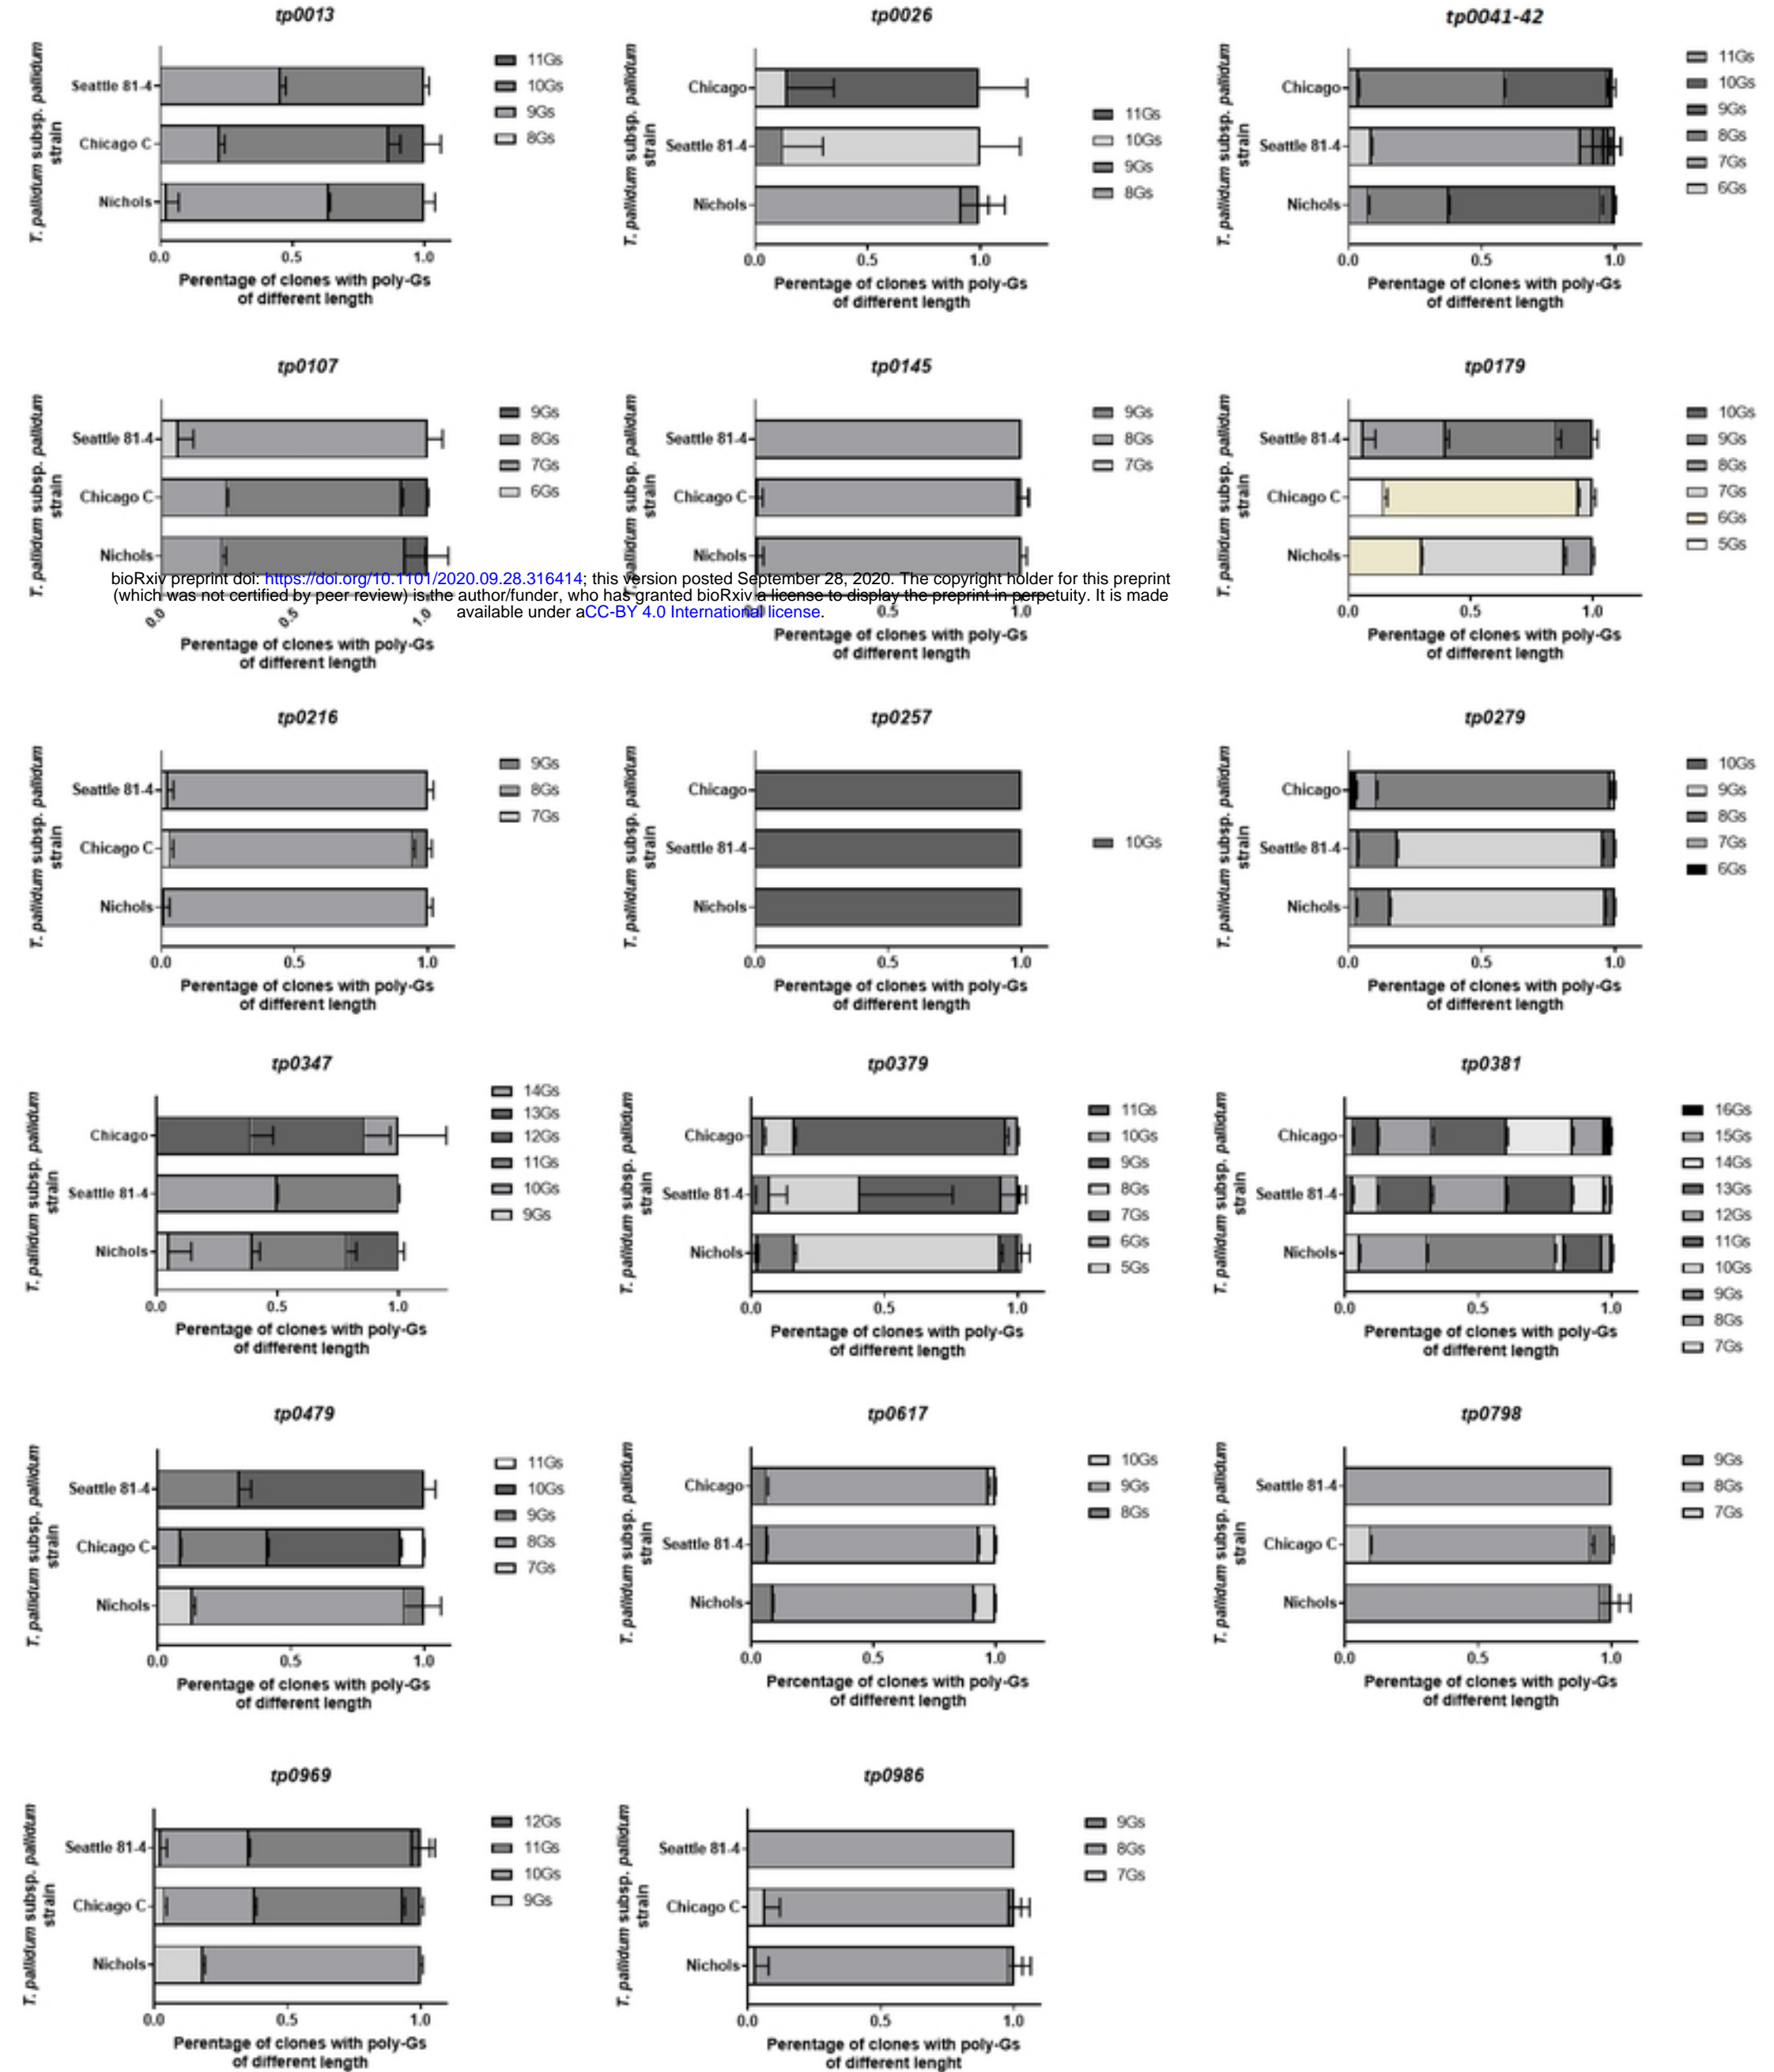

bioRxiv preprint doi: <https://doi.org/10.1101/2020.09.28.316414>; this version posted September 28, 2020. The copyright holder for this preprint (which was not certified by peer review) is the author/funder, who has granted bioRxiv a license to display the preprint in perpetuity. It is made available under aCC-BY 4.0 International license.

Figure 5

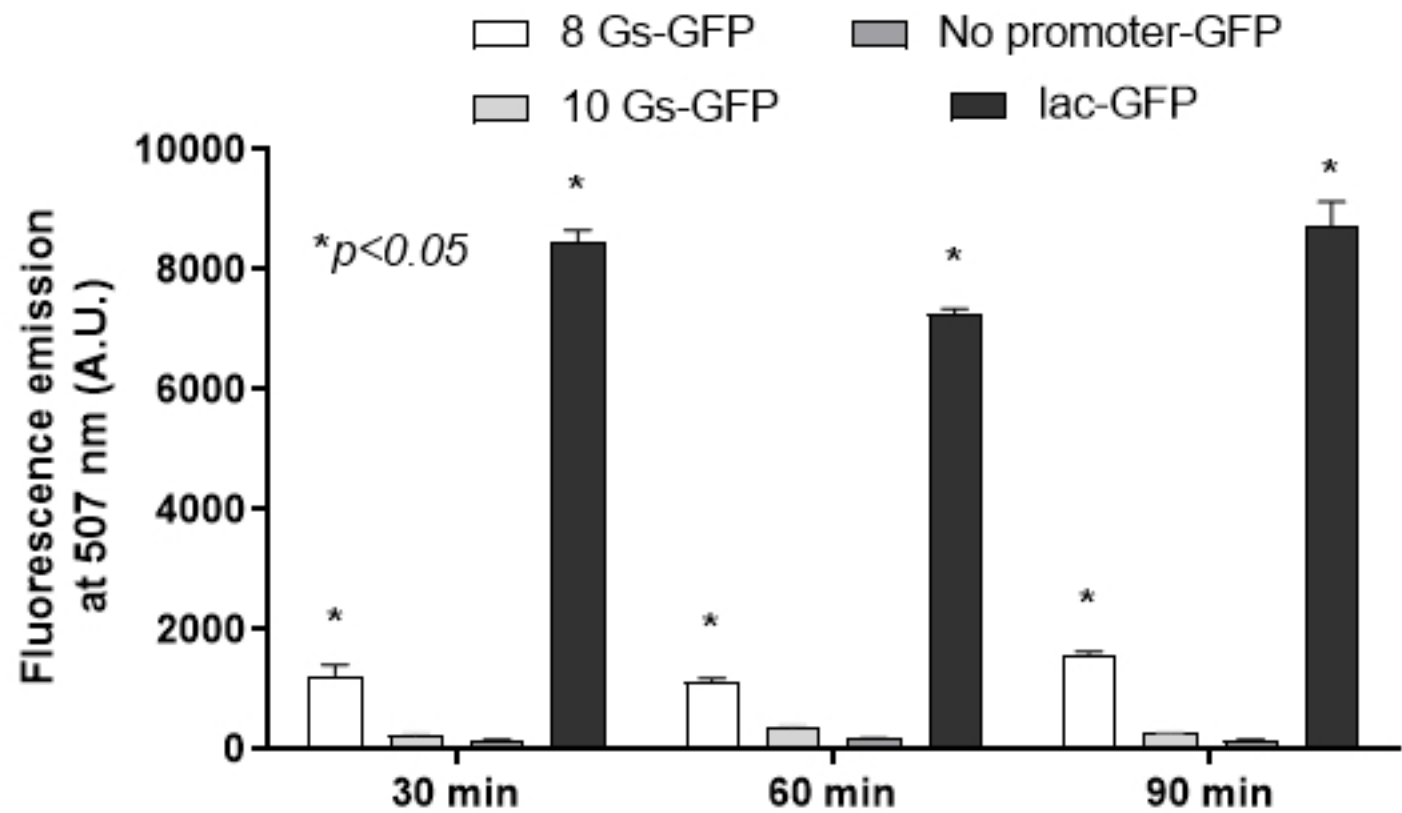

Figure 3
